# Supplementary material for: Nuclear-mitochondrial DNA segments resemble paternally inherited mitochondrial DNA in humans
Source: PubMed Central journal article supplement (PMC7142097; doi:10.1038/s41467-020-15336-3), 2020-04-08
Supplement: 41467_2020_15336_MOESM1_ESM.pdf [file 41467_2020_15336_MOESM1_ESM.pdf]

**Supplementary Information for**

**Nuclear-mitochondrial DNA segments resemble paternally inherited  
mitochondrial DNA in humans**

*Wei et al.*

## Supplementary Note 1

NIHR BioResource Collaborators

### NIHR BioResource - Rare Disease and Control Collections: NIHR BioResource Core Teams

Anthony Attwood<sup>3,4</sup>, Matthew Brown<sup>3,4</sup>, Naomi Clements Brod<sup>3,4</sup>, Abigail Crisp-Hihn<sup>3,4</sup>, John Davis<sup>3,4</sup>, Sri V V Deevi<sup>3,4</sup>, Eleanor F Dewhurst<sup>3,4</sup>, Karen Edwards<sup>3,4</sup>, Marie Erwood<sup>3,4</sup>, James Fox<sup>3,4</sup>, Amy J Frary<sup>3,4</sup>, Fengyuan Hu<sup>3,4</sup>, Jennifer Jolley<sup>3,4</sup>, Nathalie Kingston<sup>4</sup>, Rachel Linger<sup>4,43</sup>, Rutendo Mapeta<sup>3,4</sup>, Jennifer Martin<sup>4,22,43</sup>, Stuart Meacham<sup>3,4</sup>, Sofia Papadia<sup>4,43</sup>, Paula J Rayner-Matthews<sup>3,4</sup>, Crina Samarghitean<sup>3,4</sup>, Olga Shamardina<sup>3,4</sup>, Ilenia Simeoni<sup>3,4</sup>, Simon Staines<sup>3,4</sup>, Emily Staples<sup>22</sup>, Hannah Stark<sup>4,43</sup>, Catherine Titterton<sup>3,4</sup>, Julie von Ziegenweidt<sup>3,4</sup>, Christopher Watt<sup>3,4</sup>, Deborah Whitehorn<sup>3,4</sup>, Yvette Wood<sup>3,4</sup>, Katherine Yates<sup>3,4,22</sup>, Ping Yu<sup>3,4</sup>, Roger James<sup>3,4</sup>, Sofie Ashford<sup>4,43</sup>, Christopher J Penkett<sup>3,4</sup>, Kathleen E Stirrups<sup>3,4</sup>, John R Bradley<sup>4,22,24,29,47</sup>; **Bleeding, thrombotic and Platelet Disorders (BPD)** Tadbir Bariana<sup>12,50</sup>, Claire Lentaigne<sup>51,52</sup>, Suthesh Sivapalaratnam<sup>45,53,54,55</sup>, Sarah K Westbury<sup>56,57</sup>, David J Allsup<sup>58,59</sup>, Tamam Bakchoul<sup>60</sup>, Tina Biss<sup>61</sup>, Sara Boyce<sup>62</sup>, Janine Collins<sup>3,53</sup>, Peter W Collins<sup>63</sup>, Nicola S Curry<sup>64</sup>, Kate Downes<sup>3,4</sup>, Tina Dutt<sup>65</sup>, Wendy N Erber<sup>66</sup>, Gillian Evans<sup>67</sup>, Tamara Everington<sup>68,69</sup>, Remi Favier<sup>70,71</sup>, Keith Gomez<sup>12,50</sup>, Daniel Greene<sup>3,4,49</sup>, Paolo Gresele<sup>72</sup>, Daniel Hart<sup>53</sup>, Rashid Kazmi<sup>62</sup>, Anne M Kelly<sup>24</sup>, Michele Lambert<sup>73,74</sup>, Bella Madan<sup>75</sup>, Sarah Mangles<sup>69</sup>, Mary Mathias<sup>76</sup>, Carolyn Millar<sup>51,52</sup>, Samya Obaji<sup>77</sup>, Kathelijne Peerlinck<sup>78</sup>, Catherine Roughley<sup>67</sup>, Sol Schulman<sup>79</sup>, Marie Scully<sup>80</sup>, Susan E Shapiro<sup>64</sup>, Keith Sibson<sup>76</sup>, Ilenia Simeoni<sup>3,4</sup>, Matthew C Sims<sup>3,81</sup>, R Campbell Tait<sup>82</sup>, Kate Talks<sup>61</sup>, Chantal Thys<sup>78</sup>, Cheng-Hock Toh<sup>65</sup>, Chris Van Geet<sup>78</sup>, John-Paul Westwood<sup>80</sup>, Sofia Papadia<sup>4,43</sup>, Andrew D Mumford<sup>56,57</sup>, Willem H Ouweland<sup>3,4,44,45,46</sup>, Kathleen Freson<sup>78</sup>, Michael A Laffan<sup>51,52</sup>; **Cerebral Small Vessel Disease (CSVD)** Rhea Y Y Tan<sup>30</sup>, Kirsty Harkness<sup>83</sup>, Sarju Mehta<sup>84</sup>, Keith W Muir<sup>85</sup>, Ahamad Hassan<sup>86</sup>, Matthew Traylor<sup>30</sup>, Anna M Drazyk<sup>30</sup>, Hugh S Markus<sup>30</sup>; **Ehlers Danlos Syndrome (EDS)** David Parry<sup>7</sup>, Munaza Ahmed<sup>87</sup>, Hanadi Kazkaz<sup>80</sup>, Anthony M Vandersteen<sup>88</sup>, Timothy J Aitman<sup>6,7</sup>; **Hypertrophic Cardiomyopathy (HCM)** Elizabeth Ormondroyd<sup>36,37</sup>, Kate Thomson<sup>36,37</sup>, Timothy Dent<sup>37</sup>, Paul Brennan<sup>15,16,17</sup>, Rachel J Buchan<sup>89,90</sup>, Teofila Bueser<sup>21,26,91</sup>, Gerald Carr-White<sup>20</sup>, Stuart Cook<sup>89,92,93,94</sup>, Matthew J Daniels<sup>36,37,95</sup>, Andrew R Harper<sup>35,36,89</sup>, James S Ware<sup>89,90,92</sup>, Hugh Watkins<sup>35,36,37</sup>; **Intrahepatic Cholestasis of Pregnancy (ICP)** Peter H Dixon<sup>41</sup>, Jenny Chambers<sup>41,96</sup>, Floria Cheng<sup>96</sup>, Maria C Estiu<sup>97</sup>, William M Hague<sup>98</sup>, Hanns-Ulrich Marschall<sup>99</sup>, Marta Vazquez-Lopez<sup>96</sup>, Catherine Williamson<sup>41,42</sup>; **Inherited Retinal Disorders (IRD)** Gavin Arno<sup>38,39</sup>, Eleanor F Dewhurst<sup>3,4</sup>, Marie Erwood<sup>3,4</sup>, Courtney E French<sup>100</sup>, Michel Michaelides<sup>38</sup>, Anthony T Moore<sup>38,39,101</sup>, Alba Sanchis-Juan<sup>3,4</sup>, Keren Carss<sup>3,4</sup>, Andrew R Webster<sup>38,39</sup>, F Lucy Raymond<sup>4,28</sup>; **Leber Hereditary Optic Neuropathy (LHON)** Philip Griffiths<sup>102,103</sup>, Rita Horvath<sup>34,104</sup>, Gavin Hudson<sup>34</sup>, Neringa Jurkute<sup>12,38</sup>, Angela Pyle<sup>34</sup>, Patrick Yu-Wai-Man<sup>1,2,38,39</sup>; **Multiple Primary Malignant Tumours (MPMT)** James Whitworth<sup>28,29,105</sup>, Julian Adlard<sup>106</sup>, Munaza Ahmed<sup>87</sup>, Ruth Armstrong<sup>28,29,105</sup>, Carole Brewer<sup>107</sup>, Ruth Casey<sup>28,29,105</sup>, Trevor R P Cole<sup>108</sup>, Dafydd Gareth Evans<sup>109</sup>, Lynn Greenhalgh<sup>110</sup>, Helen L Hanson<sup>111</sup>, Jonathan Hoffman<sup>108</sup>, Louise Izatt<sup>112</sup>, Ajith Kumar<sup>87</sup>, Fiona Lalloo<sup>14</sup>, Kai Ren Ong<sup>108</sup>, Soo-Mi Park<sup>29,105,113</sup>, Claire Searle<sup>114</sup>, Lucy Side<sup>87</sup>, Katie Snape<sup>111</sup>, Emma Woodward<sup>14</sup>, Marc Tischkowitz<sup>113,115</sup>, Eamonn R Maher<sup>28,29</sup>; **Neurological and Developmental Disorders (NDD)** Keren Carss<sup>3,4</sup>, Eleanor F Dewhurst<sup>3,4</sup>, Marie Erwood<sup>3,4</sup>, Courtney E French<sup>100</sup>, Detelina Grozeva<sup>28</sup>, Manju A Kurian<sup>116,117</sup>, F Lucy Raymond<sup>4,28</sup>; **Neuropathic Pain Disorders (NPD)** Andreas C Themistocleous<sup>10</sup>, David Gosal<sup>118</sup>, Rita Horvath<sup>34,104</sup>, Andrew Marshall<sup>119,120,121</sup>, Emma Matthews<sup>122,123</sup>, Mark I McCarthy<sup>33,35,124</sup>, Tara Renton<sup>91</sup>, Andrew S C Rice<sup>125,126</sup>, Tom Vale<sup>10</sup>, Suellen M Walker<sup>9,127</sup>, Christopher Geoffrey Woods<sup>24,28</sup>, David L Bennett<sup>10</sup>; **Primary Immune Disorders (PID)** James E Thaventhiran<sup>128</sup>, Hana Lango Allen<sup>3,4</sup>, Sinisa Savic<sup>129,130</sup>, Hana Alachkar<sup>118</sup>, Richard Antrobus<sup>131</sup>, Helen E Baxendale<sup>22,23,100,132</sup>, Michael J Browning<sup>133</sup>, Matthew S Buckland<sup>134</sup>, Nichola Cooper<sup>135</sup>, J David M Edgar<sup>136,137</sup>, William Egner<sup>138</sup>, Kimberly C Gilmour<sup>9,127</sup>, Sarah Goddard<sup>139</sup>, Pavels

Gordins<sup>140</sup>, Sofia Grigoriadou<sup>141</sup>, Scott Hackett<sup>142</sup>, Rosie Hague<sup>143</sup>, Grant Hayman<sup>144</sup>, Archana Herwadkar<sup>118</sup>, Aarnoud P Huissoon<sup>142</sup>, Stephen Jolles<sup>145</sup>, Peter Kelleher<sup>146,147</sup>, Dinakantha Kumararatne<sup>148</sup>, Hilary Longhurst<sup>141</sup>, Lorena E Lorenzo<sup>141</sup>, Paul A Lyons<sup>22</sup>, Jesmeen Maimaris<sup>127</sup>, Sadia Noorani<sup>149</sup>, Alex Richter<sup>131</sup>, Crina Samarghitean<sup>3,4</sup>, Ravishankar B Sargur<sup>138</sup>, W A Carrock Sewell<sup>150</sup>, Ilenia Simeoni<sup>3,4</sup>, Emily Staples<sup>22</sup>, David Thomas<sup>22</sup>, Moira J Thomas<sup>151,152</sup>, Austen Worth<sup>9</sup>, Patrick F K Yong<sup>153</sup>, Taco W Kuijpers<sup>154,155</sup>, Adrian J Thrasher<sup>127</sup>, Kenneth G C Smith<sup>22</sup>;  
**Primary Membranoproliferative Glomerulonephritis (PMG)** Adam P Levine<sup>11</sup>, Omid Sadeghi-Alavijeh<sup>11</sup>, Edwin K S Wong<sup>16,156</sup>, H Terence Cook<sup>157</sup>, Melanie M Y Chan<sup>11</sup>, Matthew Hall<sup>158</sup>, Claire Harris<sup>156</sup>, Paul McAlinden<sup>156</sup>, Kevin J Marchbank<sup>156,159</sup>, Stephen Marks<sup>9</sup>, Heather Maxwell<sup>143</sup>, Monika Mozere<sup>11</sup>, Julie Wessels<sup>139</sup>, Sally A Johnson<sup>156,160</sup>, Daniel P Gale<sup>11</sup>;  
**Pulmonary Arterial Hypertension (PAH)** Marta Bleda<sup>22</sup>, Charaka Hadinnapola<sup>22</sup>, Matthias Haimel<sup>3,4,22</sup>, Emilia Swietlik<sup>22</sup>, Harm Bogaard<sup>161</sup>, Colin Church<sup>162</sup>, Gerry Coghlan<sup>134</sup>, Robin Condliffe<sup>163</sup>, Paul Corris<sup>156,164</sup>, Cesare Danesino<sup>165</sup>, Mélanie Eyries<sup>166</sup>, Henning Gall<sup>167</sup>, Hossein-Ardeschir Ghofrani<sup>135,167</sup>, J Simon R Gibbs<sup>89</sup>, Barbara Girerd<sup>168,169,170</sup>, Simon Holden<sup>84</sup>, Arjan Houweling<sup>161</sup>, Luke S Howard<sup>89,171</sup>, Marc Humbert<sup>168,169,170</sup>, David G Kiely<sup>163</sup>, Gabor Kovacs<sup>172,173</sup>, Allan Lawrie<sup>174</sup>, Robert V MacKenzie Ross<sup>175</sup>, Jennifer Martin<sup>4,22,43</sup>, Shahin Moledina<sup>9</sup>, David Montani<sup>168,169,170</sup>, Michael Newnham<sup>22,23</sup>, Andrea Olschewski<sup>172</sup>, Horst Olschewski<sup>172,173</sup>, Andrew Peacock<sup>162</sup>, Joanna Pepke-Zaba<sup>23</sup>, Laura Scelsi<sup>176</sup>, Werner Seeger<sup>167</sup>, Florent Soubrier<sup>166</sup>, Jay Suntharalingam<sup>175</sup>, Mark Toshner<sup>22,23</sup>, Carmen Treacy<sup>22,23</sup>, Richard Trembath<sup>26</sup>, Anton Vonk Noordegraaf<sup>161</sup>, Quinten Waisfisz<sup>177</sup>, John Wharton<sup>135</sup>, Martin R Wilkins<sup>135</sup>, Stephen J Wort<sup>90,178</sup>, Katherine Yates<sup>3,4,22</sup>, Stefan Gräf<sup>3,4,22</sup>, Nicholas W Morrell<sup>4,22</sup>;  
**Stem cell and Myeloid Disorders (SMD)** Eleni Louka<sup>31,33</sup>, Noemi B Roy<sup>31,32,33</sup>, Anupama Rao<sup>9</sup>, Philip Ancliff<sup>9</sup>, Christian Babbs<sup>31,33</sup>, D Mark Layton<sup>51,52</sup>, Adam J Mead<sup>31</sup>, Jennifer O'Sullivan<sup>75</sup>, Steven Okoli<sup>31,33</sup>, Irene Roberts<sup>31,32,33</sup>;  
**Steroid Resistant Nephrotic Syndrome (SRNS)** Moin Saleem<sup>179,180</sup>, Agnieszka Bierzynska<sup>179</sup>, Carmen Bugarin Diz<sup>26</sup>, Elizabeth Colby<sup>179</sup>, Melanie N Ekani<sup>20</sup>, Simon Satchell<sup>179,181</sup>, Ania Koziell<sup>26,27</sup>

### Author addresses and affiliations

<sup>1</sup>Department of Clinical Neurosciences, School of Clinical Medicine, University of Cambridge, Cambridge Biomedical Campus, Cambridge, UK. <sup>2</sup>Medical Research Council Mitochondrial Biology Unit, Cambridge Biomedical Campus, Cambridge, UK. <sup>3</sup>Department of Haematology, University of Cambridge, Cambridge Biomedical Campus, Cambridge, UK. <sup>4</sup>NIHR BioResource, Cambridge University Hospitals NHS Foundation, Cambridge Biomedical Campus, Cambridge, UK. <sup>5</sup>Genomics England, Charterhouse Square, London, UK. <sup>6</sup>MRC Clinical Sciences Centre, Faculty of Medicine, Imperial College London, London, UK. <sup>7</sup>Institute of Genetics and Molecular Medicine, University of Edinburgh, Edinburgh, UK. <sup>8</sup>Genetics and Genomic Medicine Programme, UCL Great Ormond Street Institute of Child Health, London, UK. <sup>9</sup>Great Ormond Street Hospital for Children NHS Foundation Trust, London, UK. <sup>10</sup>The Nuffield Department of Clinical Neurosciences, University of Oxford, John Radcliffe Hospital, Oxford, UK. <sup>11</sup>UCL Centre for Nephrology, University College London, London, UK. <sup>12</sup>University College London, London, UK. <sup>13</sup>Evolution and Genomic Sciences, Faculty of Biology, Medicine and Health, University of Manchester, Manchester, UK. <sup>14</sup>Manchester Centre for Genomic Medicine, St Mary's Hospital, Manchester Universities Foundation NHS Trust, Manchester, UK. <sup>15</sup>Newcastle University, Newcastle upon Tyne, UK. <sup>16</sup>Newcastle upon Tyne Hospitals NHS Foundation Trust, Newcastle upon Tyne, UK. <sup>17</sup>Northern Genetics Service, Newcastle upon Tyne Hospitals NHS Foundation Trust, Newcastle upon Tyne, UK. <sup>18</sup>UCL Institute of Cardiovascular Science, University College London, London, UK. <sup>19</sup>Barts Heart Centre, St Bartholomew's Hospital, Barts Health NHS Trust, London, UK. <sup>20</sup>Guy's and St Thomas' Hospital, Guy's and St Thomas' NHS Foundation Trust, London, UK. <sup>21</sup>Clinical Genetics Department, Guy's and St Thomas NHS Foundation Trust, London, UK. <sup>22</sup>Department of Medicine, School of Clinical Medicine, University of Cambridge,

Cambridge Biomedical Campus, Cambridge, UK. <sup>23</sup>Royal Papworth Hospital NHS Foundation Trust, Cambridge, UK. <sup>24</sup>Addenbrookes Hospital, Cambridge University Hospitals NHS Foundation Trust, Cambridge, UK. <sup>25</sup>Department of Molecular Neuroscience, UCL Institute of Neurology, London, UK. <sup>26</sup>King's College London, London, UK. <sup>27</sup>Department of Paediatric Nephrology, Evelina London Children's Hospital, Guy's & St Thomas' NHS Foundation Trust, London, UK. <sup>28</sup>Department of Medical Genetics, Cambridge Institute for Medical Research, University of Cambridge, Cambridge Biomedical Campus, Cambridge, UK. <sup>29</sup>NIHR Cambridge Biomedical Research Centre, Cambridge Biomedical Campus, Cambridge, UK. <sup>30</sup>Stroke Research Group, Department of Clinical Neurosciences, University of Cambridge, Cambridge Biomedical Campus, Cambridge, UK. <sup>31</sup>MRC Molecular Haematology Unit, MRC Weatherall Institute of Molecular Medicine, University of Oxford, Oxford, UK. <sup>32</sup>Department of Paediatrics, Weatherall Institute of Molecular Medicine, University of Oxford, Oxford, UK. <sup>33</sup>NIHR Oxford Biomedical Research Centre, Oxford University Hospitals Trust, Oxford, UK. <sup>34</sup>Institute of Genetic Medicine, Newcastle University, Newcastle upon Tyne, UK. <sup>35</sup>Wellcome Centre for Human Genetics, University of Oxford, Oxford, UK. <sup>36</sup>Department of Cardiovascular Medicine, Radcliffe Department of Medicine, University of Oxford, Oxford, UK. <sup>37</sup>Oxford University Hospitals NHS Foundation Trust, Oxford, UK. <sup>38</sup>Moorfields Eye Hospital NHS Foundation Trust, London, UK. <sup>39</sup>UCL Institute of Ophthalmology, University College London, London, UK. <sup>40</sup>MRC Weatherall Institute of Molecular Medicine, University of Oxford, John Radcliffe Hospital, Oxford, UK. <sup>41</sup>Division of Women's Health, King's College London, London, UK. <sup>42</sup>Institute of Reproductive and Developmental Biology, Surgery and Cancer, Hammersmith Hospital, Imperial College Healthcare NHS Trust, London, UK. <sup>43</sup>Department of Public Health and Primary Care, University of Cambridge, Cambridge, UK. <sup>44</sup>Wellcome Sanger Institute, Wellcome Genome Campus, Hinxton, Cambridge, UK. <sup>45</sup>NHS Blood and Transplant, Cambridge Biomedical Campus, Cambridge, UK. <sup>46</sup>British Heart Foundation Cambridge Centre of Excellence, University of Cambridge, Cambridge, UK. <sup>47</sup>Department of Renal Medicine, Addenbrookes Hospital, Cambridge University Hospitals NHS Foundation Trust, Cambridge, UK. <sup>48</sup>William Harvey Research Institute, NIHR Biomedical Research Centre at Barts, Queen Mary University of London, London, UK. <sup>49</sup>MRC Biostatistics Unit, Cambridge Institute of Public Health, University of Cambridge, Cambridge, UK. <sup>50</sup>The Katharine Dormandy Haemophilia Centre and Thrombosis Unit, Royal Free London NHS Foundation Trust, London, UK. <sup>51</sup>Department of Haematology, Hammersmith Hospital, Imperial College Healthcare NHS Trust, London, UK. <sup>52</sup>Centre for Haematology, Imperial College London, London, UK. <sup>53</sup>The Royal London Hospital, Barts Health NHS Foundation Trust, London, UK. <sup>54</sup>Department of Haematology, Cambridge University Hospitals NHS Foundation Trust, Cambridge, UK. <sup>55</sup>Queen Mary University of London, London, UK. <sup>56</sup>School of Cellular and Molecular Medicine, University of Bristol, Bristol, UK. <sup>57</sup>University Hospitals Bristol NHS Foundation Trust, Bristol, UK. <sup>58</sup>Queens Centre for Haematology and Oncology, Castle Hill Hospital, Hull and East Yorkshire NHS Trust, Cottingham, UK. <sup>59</sup>Hull York Medical School, University of Hull, Hull, UK. <sup>60</sup>Center for Clinical Transfusion Medicine, University Hospital of Tübingen, Tübingen, Germany. <sup>61</sup>Haematology Department, Royal Victoria Infirmary, The Newcastle upon Tyne Hospitals NHS Foundation Trust, Newcastle upon Tyne, UK. <sup>62</sup>Southampton General Hospital, University Hospital Southampton NHS Foundation Trust, Southampton, UK. <sup>63</sup>Institute of Infection and Immunity, School of Medicine Cardiff University, Cardiff, UK. <sup>64</sup>Oxford Haemophilia and Thrombosis Centre, Oxford University Hospitals NHS Trust, Oxford Comprehensive Biomedical Research Centre, Oxford, UK. <sup>65</sup>The Roald Dahl Haemostasis and Thrombosis Centre, The Royal Liverpool University Hospital, Liverpool, UK. <sup>66</sup>Medical School and School of Biomedical Sciences, Faculty of Health and Medical Sciences, The University of Western Australia, Crawley, Australia. <sup>67</sup>Haemophilia Centre, Kent & Canterbury Hospital, East Kent Hospitals University Foundation Trust, Canterbury, UK. <sup>68</sup>Salisbury District Hospital, Salisbury NHS Foundation Trust, Salisbury, UK. <sup>69</sup>Haemophilia, Haemostasis and Thrombosis



Centre, Hampshire Hospitals NHS Foundation Trust, Basingstoke, UK. <sup>70</sup>INSERM UMR 1170, Gustave Roussy Cancer Campus, Universite Paris-Saclay, Villejuif, France. <sup>71</sup>Service d'Hematologie biologique, Centre de Reference des Pathologies Plaquettaires, Hopital Armand Trousseau, Assistance Publique-Hopitaux de Paris, Paris, France. <sup>72</sup>Section of Internal and Cardiovascular Medicine, University of Perugia, Perugia, Italy. <sup>73</sup>Division of Hematology, The Children's Hospital of Philadelphia, Philadelphia, USA. <sup>74</sup>Department of Pediatrics, Perelman School of Medicine at the University of Pennsylvania, Philadelphia, USA. <sup>75</sup>Department of Haematology, Guy's and St Thomas' NHS Foundation Trust, London, UK. <sup>76</sup>Department of Haematology, Great Ormond Street Hospital for Children NHS Foundation Trust, London, UK. <sup>77</sup>The Arthur Bloom Haemophilia Centre, University Hospital of Wales, Cardiff, UK. <sup>78</sup>Department of Cardiovascular Sciences, Center for Molecular and Vascular Biology, KULeuven, Leuven, Belgium. <sup>79</sup>Beth Israel Deaconess Medical Centre and Harvard Medical School, Boston, USA. <sup>80</sup>University College London Hospitals NHS Foundation Trust, London, UK. <sup>81</sup>Oxford Haemophilia and Thrombosis Centre, The Churchill Hospital, Oxford University Hospitals NHS Trust, Oxford, UK. <sup>82</sup>Glasgow Royal Infirmary, NHS Greater Glasgow and Clyde, Glasgow, UK. <sup>83</sup>Department of Neurology, Sheffield Teaching Hospitals NHS Foundation Trust, Sheffield, UK. <sup>84</sup>Department of Clinical Genetics, Addenbrookes Hospital, Cambridge University Hospitals NHS Foundation Trust, Cambridge, UK. <sup>85</sup>Institute of Neuroscience and Psychology, University of Glasgow, Glasgow, UK. <sup>86</sup>Department of Neurology, Leeds Teaching Hospital NHS Trust, Leeds, UK. <sup>87</sup>North East Thames Regional Genetics Service, Great Ormond Street Hospital for Children NHS Foundation Trust, London, UK. <sup>88</sup>Division of Medical Genetics, IWK Health Centre, Dalhousie University, Halifax, Canada. <sup>89</sup>National Heart and Lung Institute, Imperial College London, London, UK. <sup>90</sup>Royal Brompton Hospital, Royal Brompton and Harefield NHS Foundation Trust, London, UK. <sup>91</sup>King's College Hospital NHS Foundation Trust, London, UK. <sup>92</sup>MRC London Institute of Medical Sciences, Imperial College London, London, UK. <sup>93</sup>National Heart Research Institute Singapore, National Heart Centre Singapore, Singapore, Singapore. <sup>94</sup>Division of Cardiovascular & Metabolic Disorders, Duke-National University of Singapore, Singapore, Singapore. <sup>95</sup>Department of Biotechnology, Graduate School of Engineering, Osaka University, Suita, Osaka, Japan. <sup>96</sup>Women's Health Research Centre, Surgery and Cancer, Faculty of Medicine, Hammersmith Hospital, Imperial College Healthcare NHS Trust, London, UK. <sup>97</sup>Ramón Sardá Mother's and Children's Hospital, Buenos Aires, Argentina. <sup>98</sup>Robinson Research Institute, Discipline of Obstetrics and Gynaecology, The University of Adelaide, Women's and Children's Hospital, Adelaide, Australia. <sup>99</sup>Department of Molecular and Clinical Medicine, Sahlgrenska Academy, University of Gothenburg, Gothenburg, Sweden. <sup>100</sup>Department of Paediatrics, School of Clinical Medicine, University of Cambridge, Cambridge Biomedical Campus, Cambridge, UK. <sup>101</sup>Ophthalmology Department, UCSF School of Medicine, San Francisco, USA. <sup>102</sup>Wellcome Centre for Mitochondrial Research, Institute of Genetic Medicine, Newcastle University, Newcastle upon Tyne, UK. <sup>103</sup>Institute of Genetic Medicine, Newcastle University, Newcastle upon Tyne, UK. <sup>104</sup>John Walton Muscular Dystrophy Research Centre, Institute of Genetic Medicine, Newcastle University, Newcastle upon Tyne, UK. <sup>105</sup>Cancer Research UK Cambridge Centre, Cambridge Biomedical Campus, Cambridge, UK. <sup>106</sup>Yorkshire Regional Genetics Service, Chapel Allerton Hospital, Leeds Teaching Hospitals NHS Trust, Leeds, UK. <sup>107</sup>Department of Clinical Genetics, Royal Devon & Exeter Hospital, Royal Devon and Exeter NHS Foundation Trust, Exeter, UK. <sup>108</sup>West Midlands Regional Genetics Service, Birmingham Women's and Children's NHS Foundation Trust, Birmingham, UK. <sup>109</sup>Manchester University NHS Foundation Trust, Manchester, UK. <sup>110</sup>Department of Clinical Genetics, Liverpool Women's NHS Foundation, Liverpool, UK. <sup>111</sup>Department of Clinical Genetics, St George's University Hospitals NHS Foundation Trust, London, UK. <sup>112</sup>Department of Clinical Genetics, Guy's and St Thomas' NHS Foundation Trust, London, UK. <sup>113</sup>East Anglian Medical Genetics Service, Cambridge University Hospitals NHS Foundation Trust, Cambridge, UK. <sup>114</sup>Department of Clinical Genetics, Nottingham University

Hospitals NHS Trust, Nottingham, UK. <sup>115</sup>Department of Medical Genetics and NIHR Cambridge Biomedical Research Centre, University of Cambridge, Cambridge, UK. <sup>116</sup>Developmental Neurosciences, UCL Great Ormond Street Institute of Child Health, London, UK. <sup>117</sup>Department of Neurology, Great Ormond Street Hospital for Children NHS Foundation Trust, London, UK. <sup>118</sup>Salford Royal NHS Foundation Trust, Salford, UK. <sup>119</sup>Faculty of Medical and Human Sciences, Centre for Endocrinology and Diabetes, Institute of Human Development, University of Manchester, Manchester, UK. <sup>120</sup>Department of Clinical Neurophysiology, Manchester Royal Infirmary, Central Manchester University Hospitals National Health Service Foundation Trust, Manchester Academic Health Science Centre, Manchester, UK. <sup>121</sup>National Institute for Health Research/Wellcome Trust Clinical Research Facility, Manchester, UK. <sup>122</sup>The National Hospital for Neurology and Neurosurgery, University College London Hospitals NHS Foundation Trust, London, UK. <sup>123</sup>MRC Centre for Neuromuscular Diseases, Department of Molecular Neuroscience, UCL Institute of Neurology, London, UK. <sup>124</sup>Oxford Centre for Diabetes, Endocrinology and Metabolism, University of Oxford, Churchill Hospital, Oxford, UK. <sup>125</sup>Pain Research, Department of Surgery and Cancer, Faculty of Medicine, Imperial College London, London, UK. <sup>126</sup>Pain Medicine, Chelsea and Westminster Hospital NHS Foundation Trust, London, UK. <sup>127</sup>UCL Great Ormond Street Institute of Child Health, London, UK. <sup>128</sup>MRC Toxicology Unit, School of Biological Sciences, University of Cambridge, Cambridge, UK. <sup>129</sup>The Department of Clinical Immunology and Allergy and The NIHR Leeds Biomedical Research Centre, Leeds, UK. <sup>130</sup>Leeds Institute of Rheumatic and Musculoskeletal Medicine, St James's University Hospital, Leeds, UK. <sup>131</sup>University Hospitals Birmingham NHS Foundation Trust, Birmingham, UK. <sup>132</sup>Division of Clinical Biochemistry and Immunology, Cambridge University Hospitals NHS Foundation Trust, Cambridge, UK. <sup>133</sup>Department of Immunology, Leicester Royal Infirmary, Leicester, UK. <sup>134</sup>Royal Free London NHS Foundation Trust, London, UK. <sup>135</sup>Department of Medicine, Imperial College London, London, UK. <sup>136</sup>Regional Immunology Service, The Royal Hospitals, Belfast, UK. <sup>137</sup>Queen's University Belfast, Belfast, UK. <sup>138</sup>Sheffield Teaching Hospitals NHS Foundation Trust, Sheffield, UK. <sup>139</sup>University Hospitals of North Midlands NHS Trust, Stoke-on-Trent, UK. <sup>140</sup>East Yorkshire Regional Adult Immunology and Allergy Unit, Hull Royal Infirmary, Hull & East Yorkshire Hospitals NHS Trust, Hull, UK. <sup>141</sup>Barts Health NHS Foundation Trust, London, UK. <sup>142</sup>Birmingham Heartlands Hospital, University Hospitals Birmingham NHS Foundation Trust, Birmingham, UK. <sup>143</sup>Royal Hospital for Children, NHS Greater Glasgow and Clyde, Glasgow, UK. <sup>144</sup>Epsom & St Helier University Hospitals NHS Trust, London, UK. <sup>145</sup>Immunodeficiency Centre for Wales, University Hospital of Wales, Cardiff, UK. <sup>146</sup>Centre for Immunology & Vaccinology, Chelsea & Westminster Hospital, Department of Medicine, Imperial College London, London, UK. <sup>147</sup>Department of Respiratory Medicine Royal Brompton & Harefield NHS Foundation Trust, London, UK. <sup>148</sup>Department of Clinical Immunology, Addenbrookes Hospital, Cambridge University Hospitals NHS Foundation Trust, Cambridge, UK. <sup>149</sup>Sandwell and West Birmingham Hospitals NHS Trust, Birmingham, UK. <sup>150</sup>Scunthorpe General Hospital, Northern Lincolnshire and Goole NHS Foundation Trust, Scunthorpe, UK. <sup>151</sup>Gartnavel General Hospital, NHS Greater Glasgow and Clyde, Glasgow, UK. <sup>152</sup>Queen Elizabeth University Hospital, Glasgow, UK. <sup>153</sup>Frimley Park Hospital, NHS Frimley Health Foundation Trust, Camberley, UK. <sup>154</sup>Department of Pediatric Hematology, Immunology, Rheumatology and Infectious Diseases, Emma Children's Hospital, Academic Medical Center (AMC), University of Amsterdam, Amsterdam, The Netherlands. <sup>155</sup>Department of Blood Cell Research, Sanquin, Amsterdam, The Netherlands. <sup>156</sup>Institute of Cellular Medicine, Faculty of Medical Sciences, Newcastle University, Newcastle upon Tyne, UK. <sup>157</sup>Imperial College Renal and Transplant Centre, Hammersmith Hospital, Imperial College Healthcare NHS Trust, London, UK. <sup>158</sup>Nottingham University Hospitals NHS Trust, Nottingham, UK. <sup>159</sup>The National Renal Complement Therapeutics Centre, Royal Victoria Infirmary, Newcastle upon Tyne, UK. <sup>160</sup>Department of Paediatric Nephrology, Great North Children's Hospital, Newcastle upon Tyne Hospitals NHS

Foundation Trust, Newcastle upon Tyne, UK. <sup>161</sup>Department of Pulmonary Medicine, VU University Medical Centre, Amsterdam, The Netherlands. <sup>162</sup>Golden Jubilee National Hospital, Glasgow, UK. <sup>163</sup>Sheffield Pulmonary Vascular Disease Unit, Royal Hallamshire Hospital NHS Foundation Trust, Sheffield, UK. <sup>164</sup>National Pulmonary Hypertension Service (Newcastle), The Newcastle upon Tyne Hospitals NHS Foundation Trust, Newcastle upon Tyne, UK. <sup>165</sup>Department of Molecular Medicine, General Biology, and Medical Genetics Unit, University of Pavia, Pavia, Italy. <sup>166</sup>Departement de Genetique & ICAN, Hopital Pitie-Salpetriere, Assistance Publique Hopitaux de Paris, Paris, France. <sup>167</sup>University of Giessen and Marburg Lung Center (UGMLC), Giessen, Germany. <sup>168</sup>Univ. Paris-Sud, Faculty of Medicine, University Paris-Saclay, Le Kremlin Bicetre, France. <sup>169</sup>Service de Pneumologie, Centre de Reference de l'Hypertension Pulmonaire, Hopital Bicetre (Assistance Publique Hopitaux de Paris), Le Kremlin Bicetre, France. <sup>170</sup>INSERM U999, Hospital Marie Lannelongue, Le Plessis Robinson, France. <sup>171</sup>National Pulmonary Hypertension Service, Imperial College Healthcare NHS Trust, London, UK. <sup>172</sup>Ludwig Boltzmann Institute for Lung Vascular Research, Graz, Austria. <sup>173</sup>Dept of Internal Medicine, Division of Pulmonology, Medical University of Graz, Graz, Austria. <sup>174</sup>Department of Infection, Immunity & Cardiovascular Disease, University of Sheffield, Sheffield, UK. <sup>175</sup>Royal United Hospitals Bath NHS Foundation Trust, Bath, UK. <sup>176</sup>Division of Cardiology, Fondazione IRCCS Policlinico S. Matteo, Pavia, Italy. <sup>177</sup>Department of Clinical Genetics, VU University Medical Centre, Amsterdam, The Netherlands. <sup>178</sup>Imperial College London, London, UK. <sup>179</sup>Bristol Renal and Children's Renal Unit, Bristol Medical School, University of Bristol, Bristol, UK. <sup>180</sup>Bristol Royal Hospital for Children, University Hospitals Bristol NHS Foundation Trust, Bristol, UK. <sup>181</sup>North Bristol NHS Trust, Bristol, UK.

## Supplementary Figures

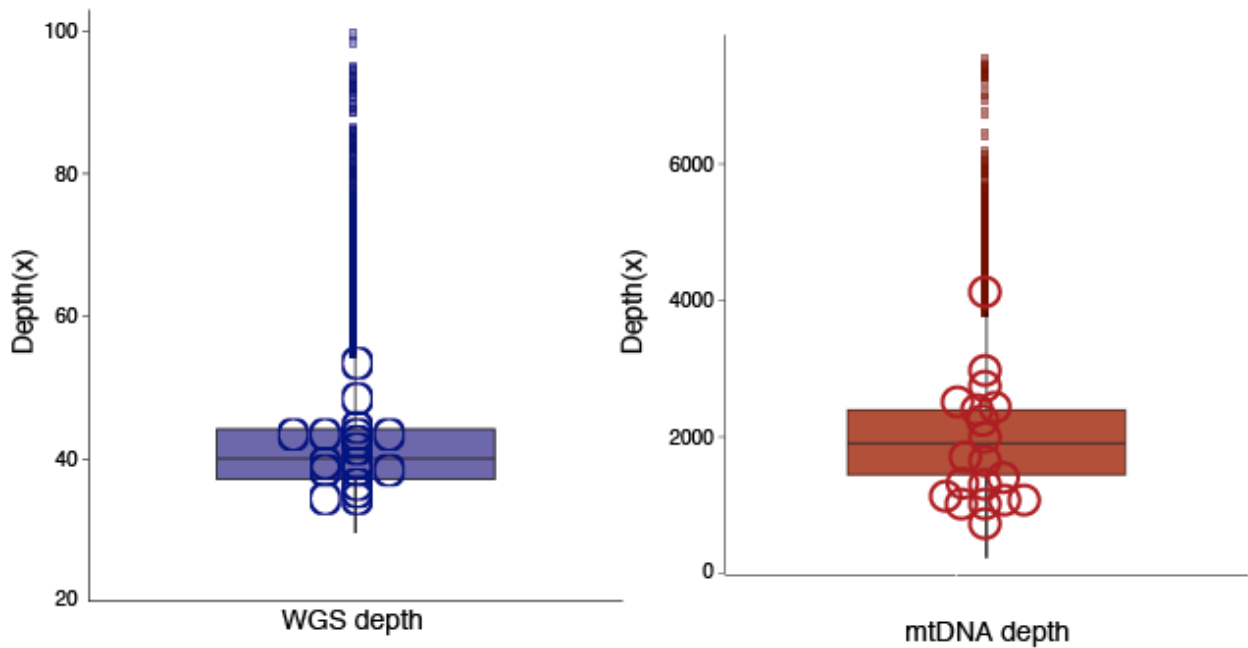

**Supplementary Figure 1. Box-whisker plots of mean depth of whole genome sequences (WGS) and mitochondrial genome sequences (mtDNA) from 11,035 trios.** The middle “box” represents the median, lower and upper quartile of the data. The upper and lower whiskers represent the data outside the middle 50%. The dots represent the data outside 25% - 75% of the data. Circles are the depth of 7 families where father and offspring carrying the mixed haplotypes (**Supplementary Table 5**).

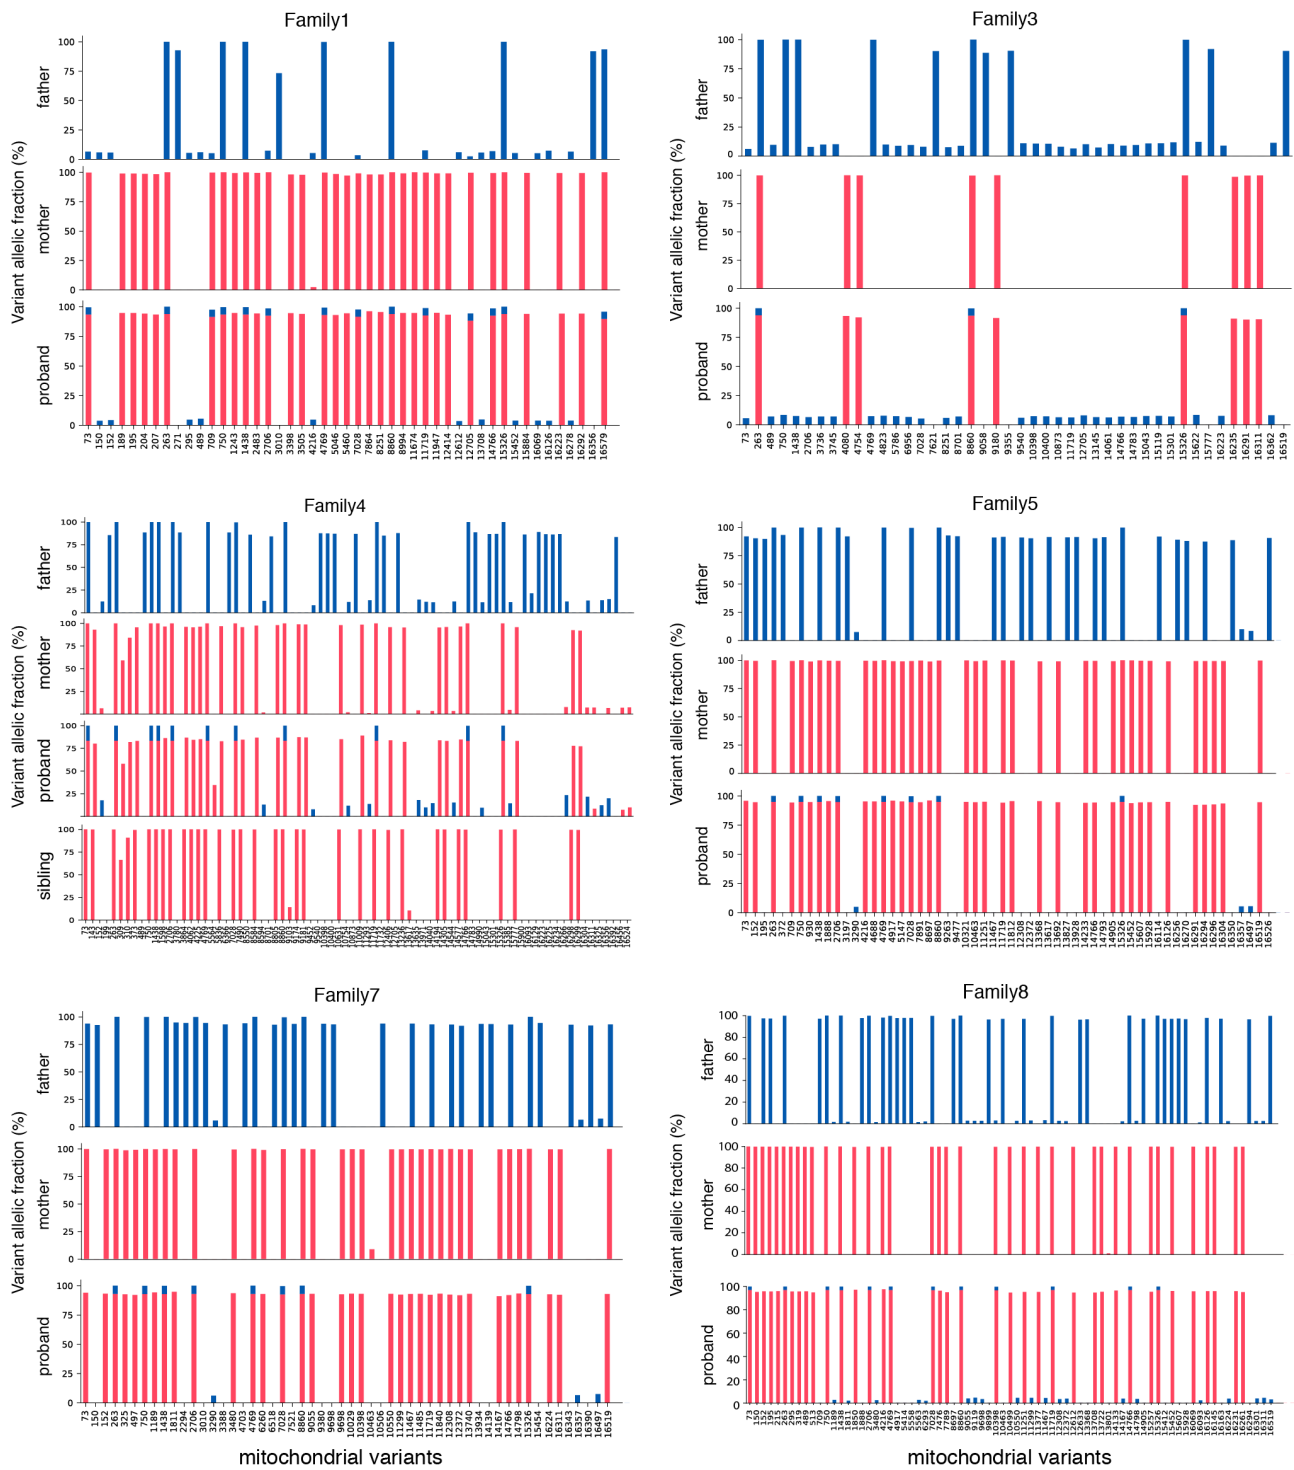

**Supplementary Figure 2 MtdNA mixed haplotype patterns observed in 6 families.** See Fig. 2a in the main text for details.

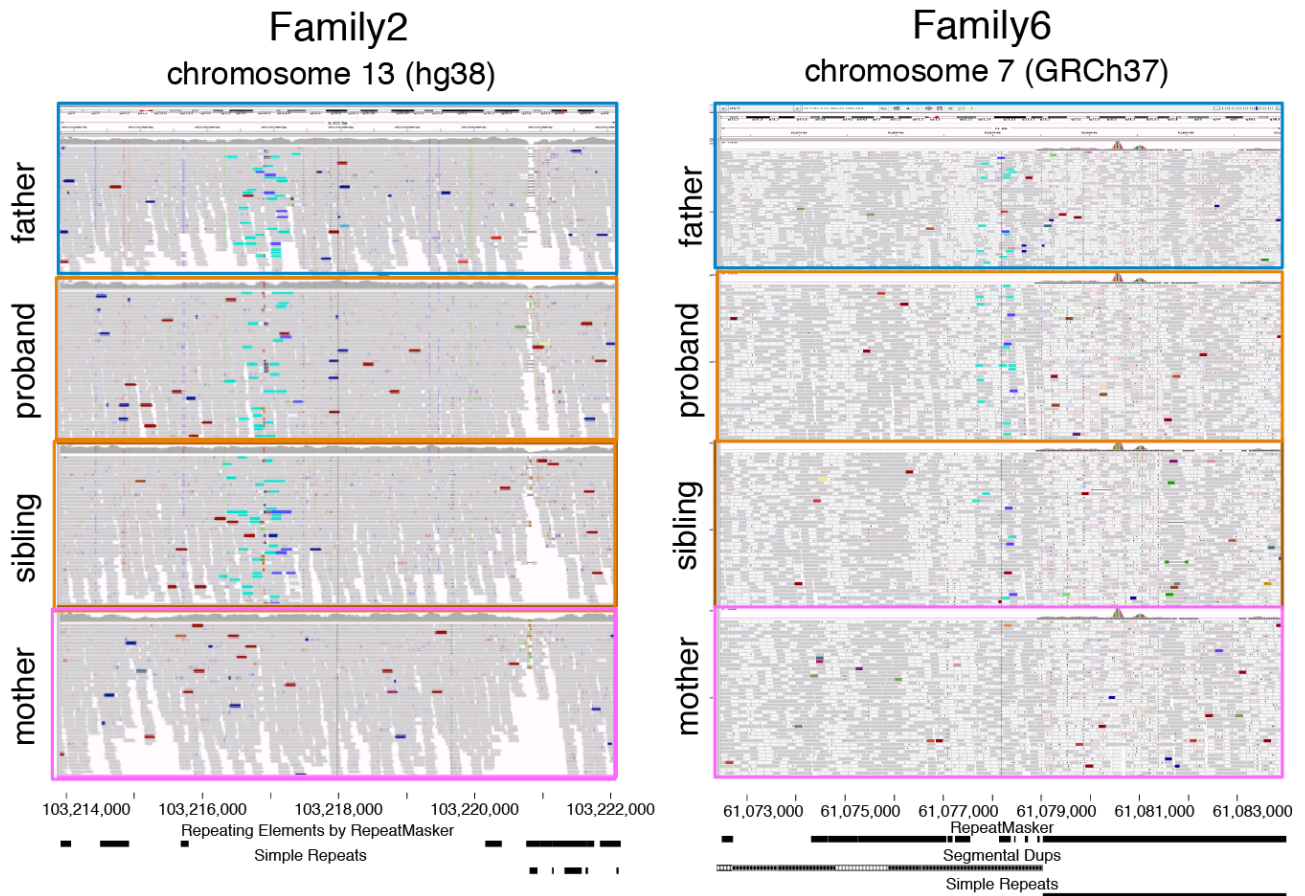

**Supplementary Figure 3. IGV screenshots of the aligned reads corresponding to NUMTs on the nuclear DNA in family 2 (left) and family 6 (right).** Teal bars indicate the aligned reads which mapped to the nuclear DNA where their mates mapped to the mtDNA. The genome position, repeats and segmental duplications tracks from UCSC genome browser are shown at the bottom.

### Family1

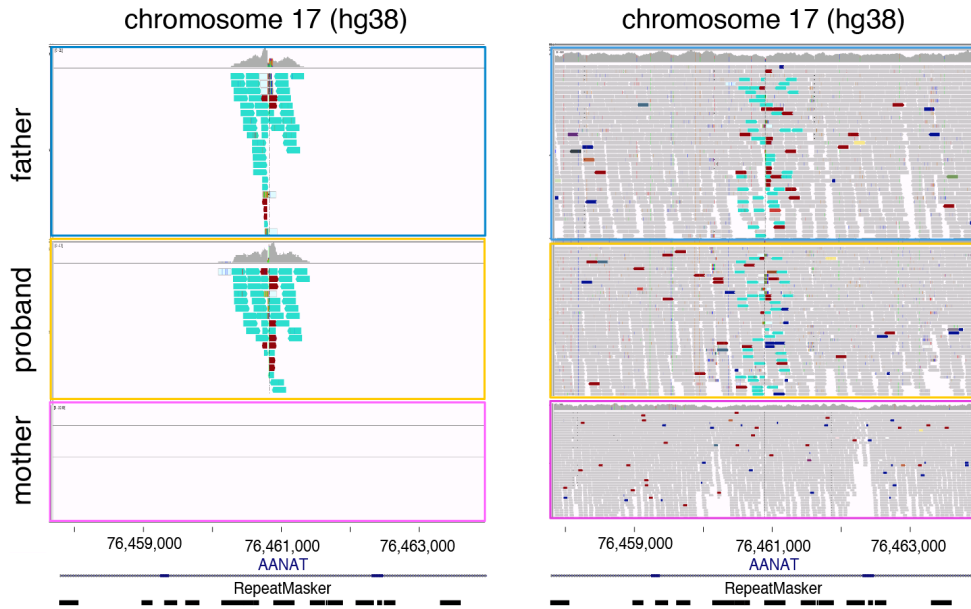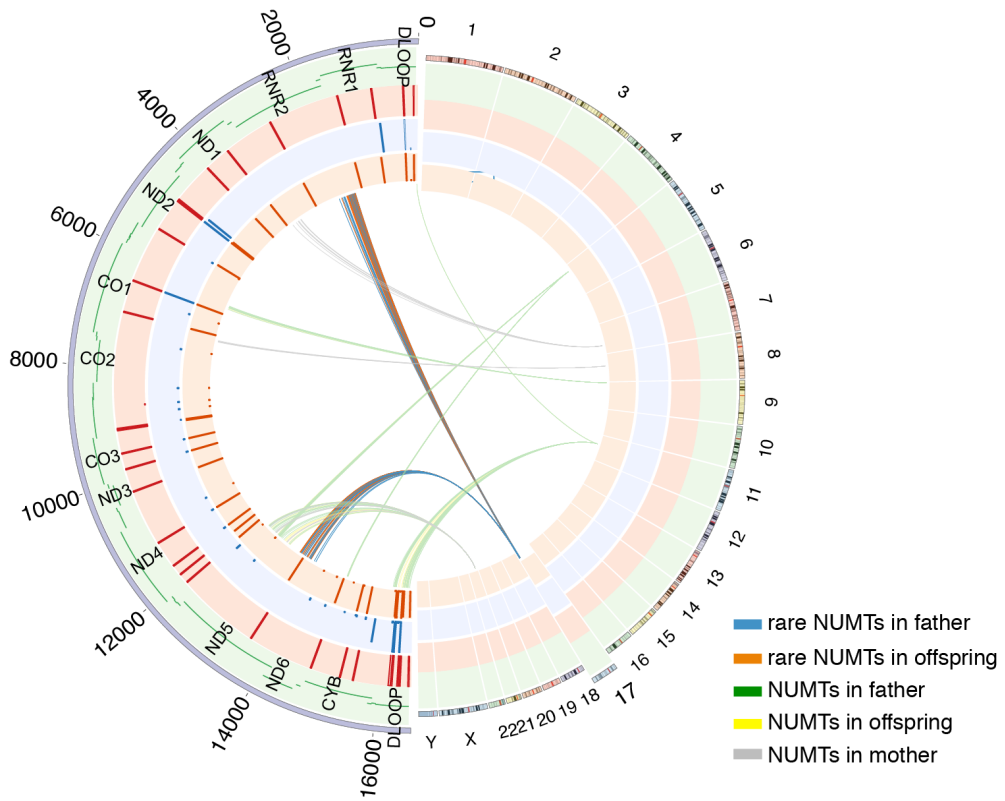

### Family 3

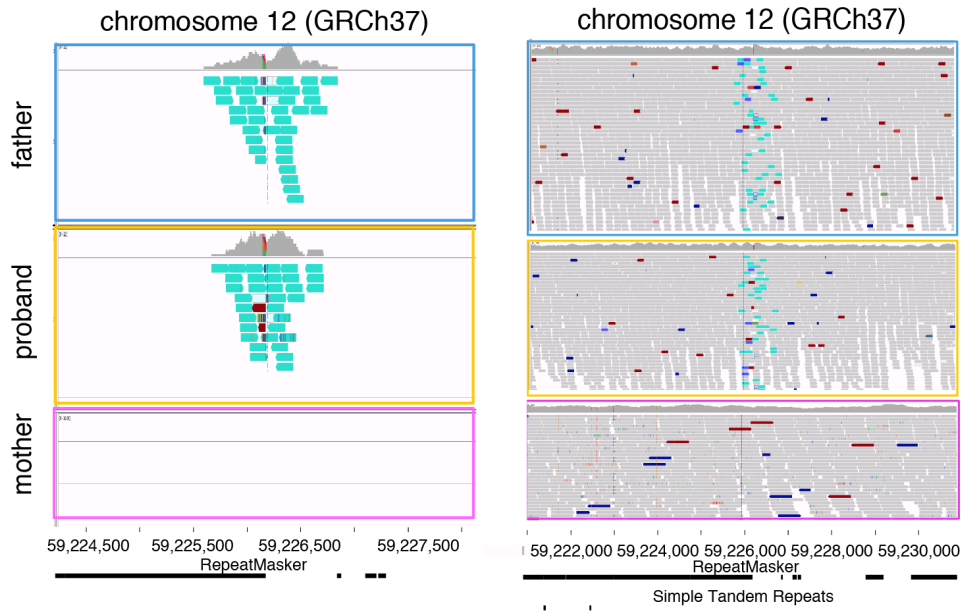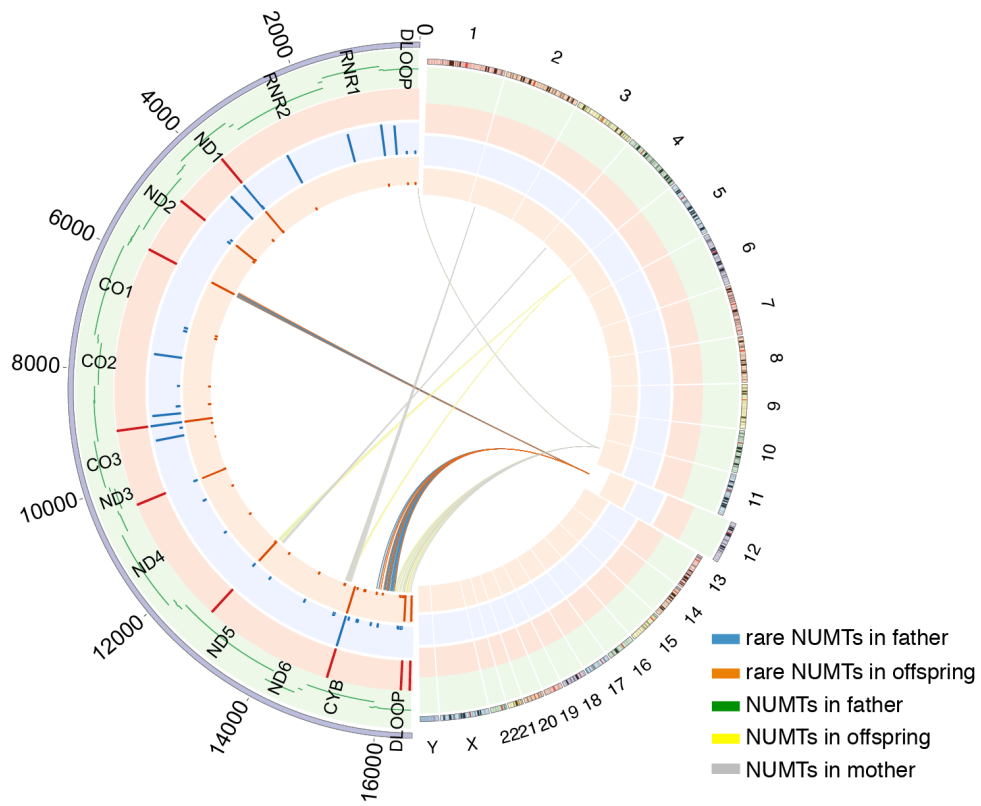



### Family4

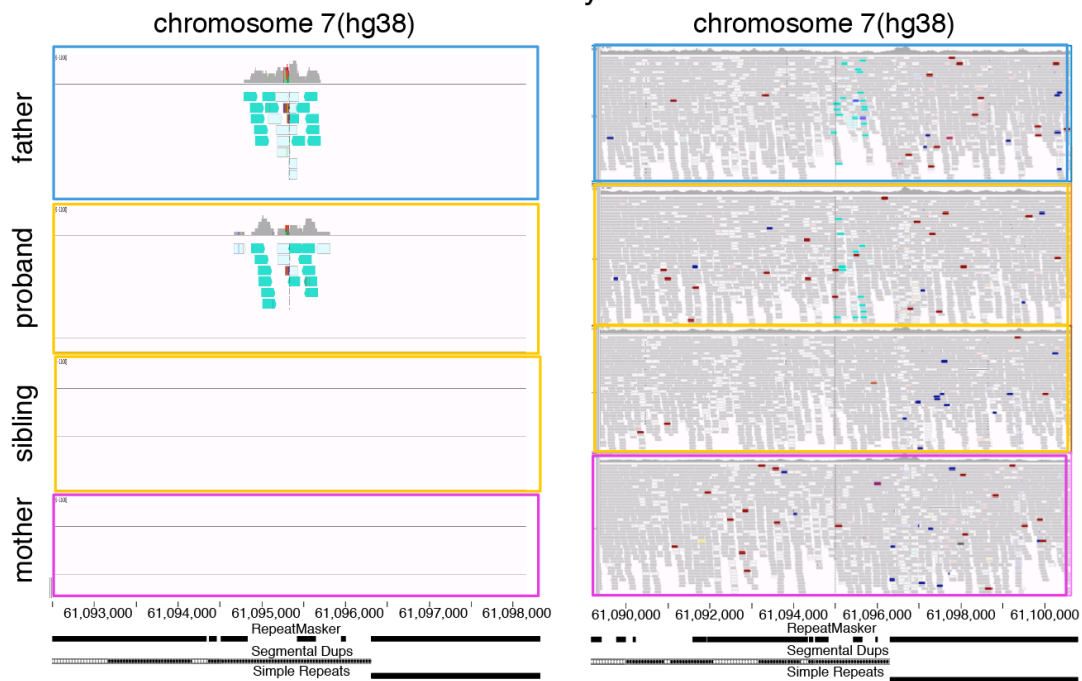

### Family4- proband

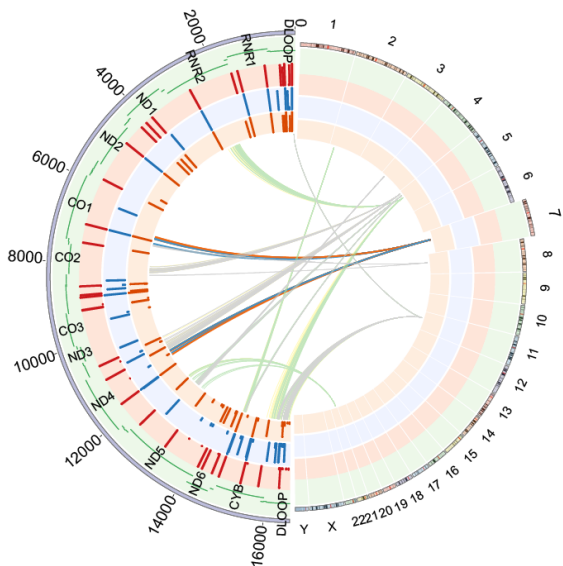

### Family4-sibling

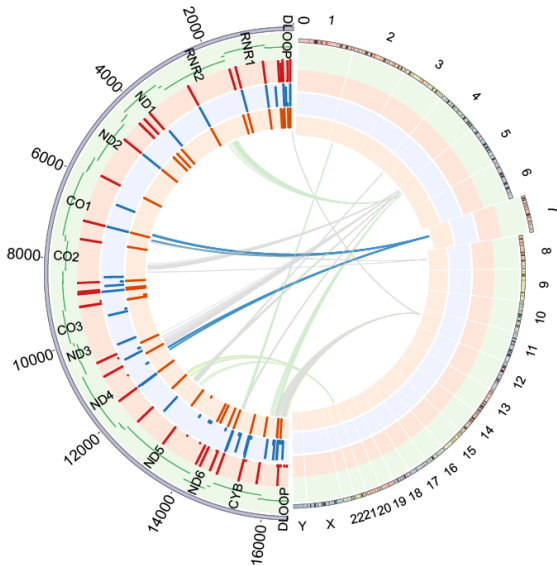

■ rare NUMTs in father      ■ rare NUMTs in offspring  
■ NUMTs in father      ■ NUMTs in offspring      ■ NUMTs in mother

### Family 5

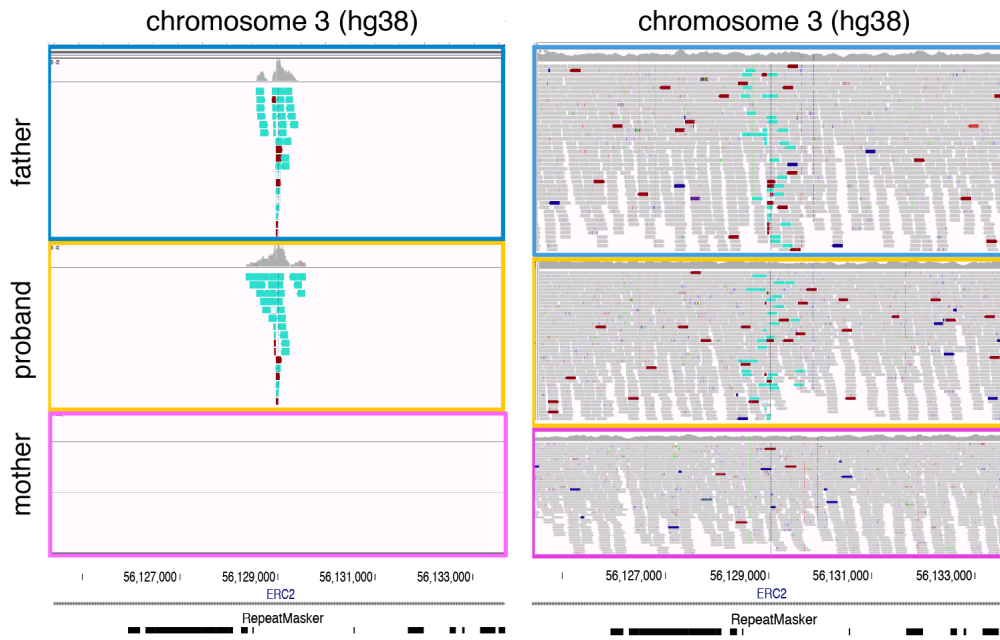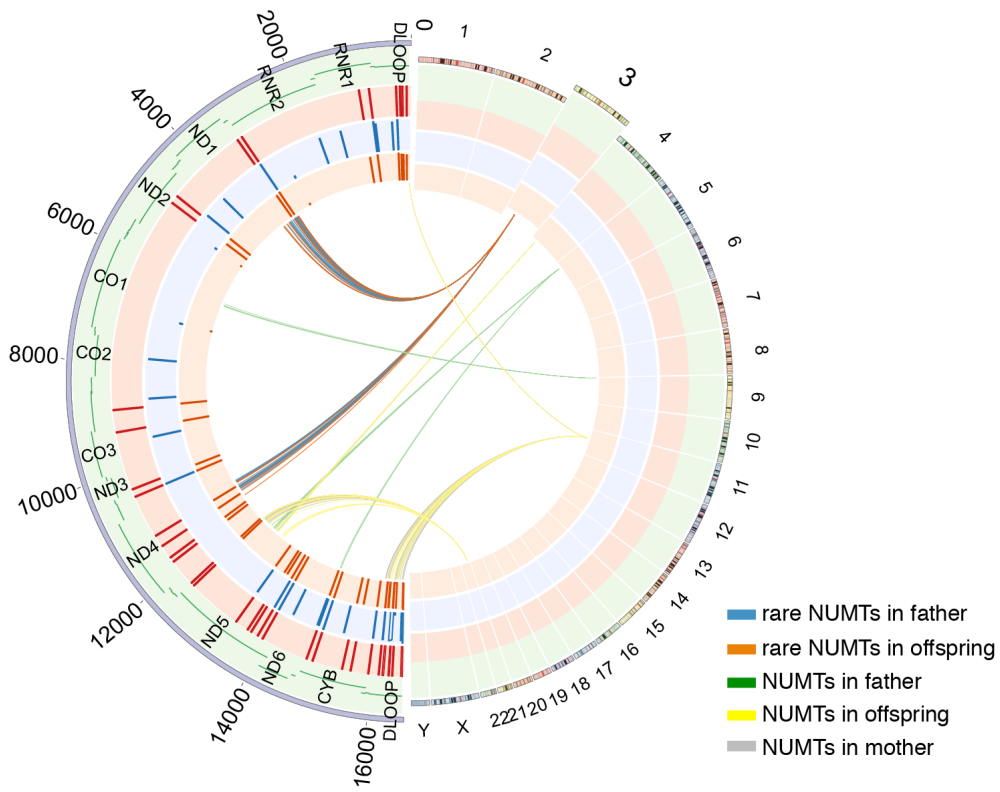

### Family 7

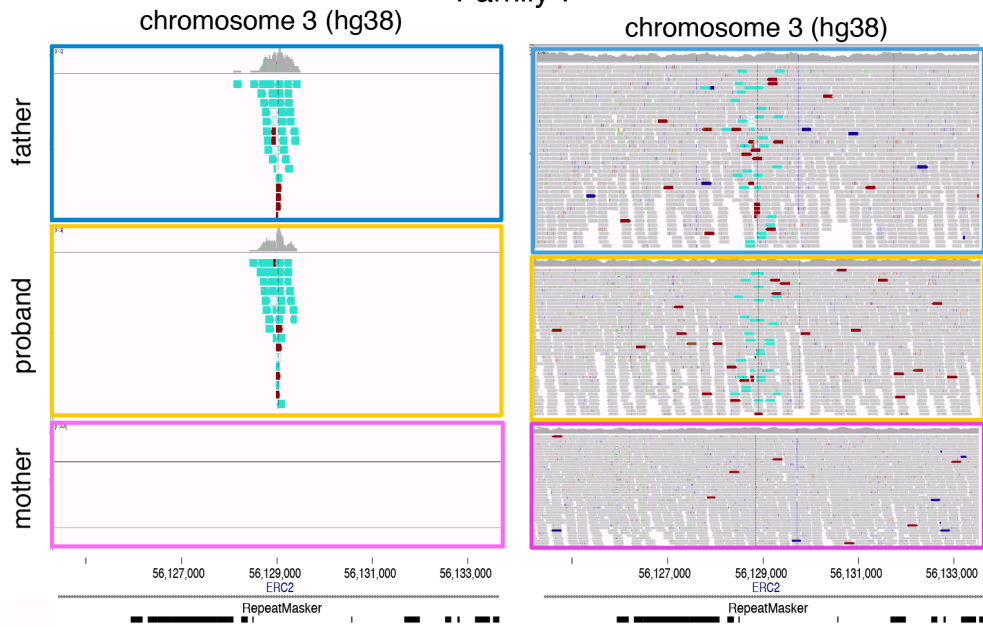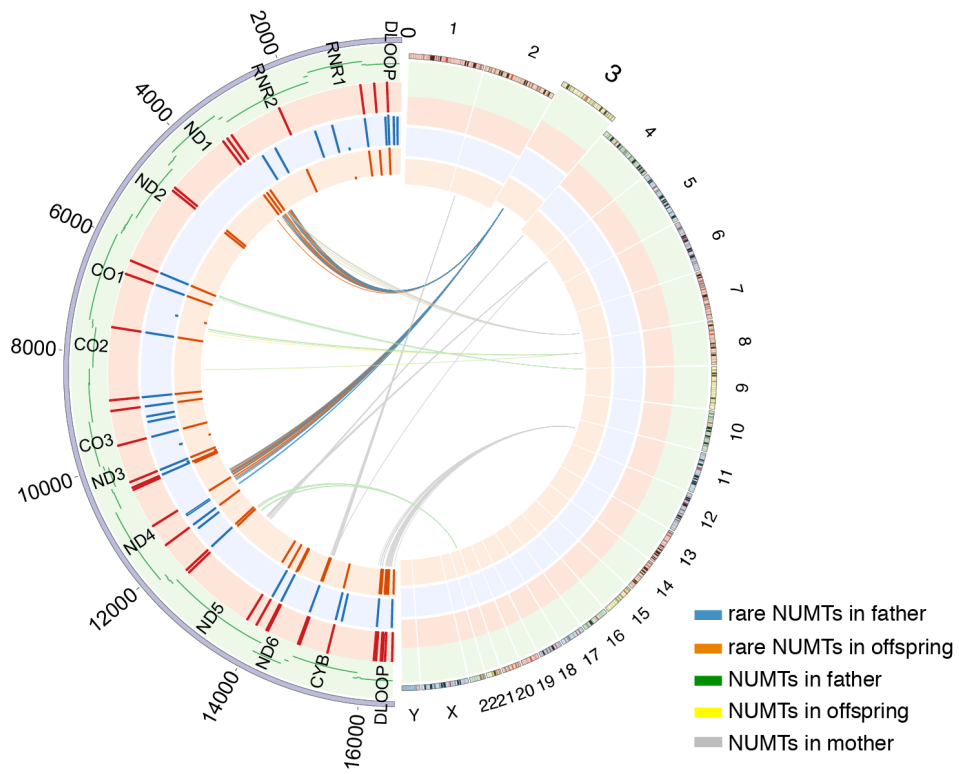

**Supplementary Figure 4 Mapping NUMTs in 5 families.** Within each family **(Top)** IGV screenshots show aligned reads corresponding to NUMTs. Top left: The alignment of the discordant and split reads corresponding to NUMTs on the nuclear DNA. Top right: The alignment of all aligned reads corresponding to NUMTs on the nuclear DNA. Teal bars indicate the aligned reads which mapped to the nuclear DNA where their mates mapped to the mtDNA. The genome position, repeats and segmental duplications tracks from UCSC genome browser are shown at the bottom. **(Bottom)** Circos plots show the detected variants and NUMTs. Circles from the outside to the inside indicate the following: (1) position of a variant on the mtDNA; (2) regions corresponding to the different mtDNA genes; (3) variants identified in the mother where the radial axis corresponds to the allele fraction (AF); (4) variants identified in the father; (5) variants identified in the offspring, proband (left) and sibling (right) in family 4 are shown, respectively; (6) NUMTs observed in the family, proband (left) and sibling (right) in family 4 are shown, respectively.

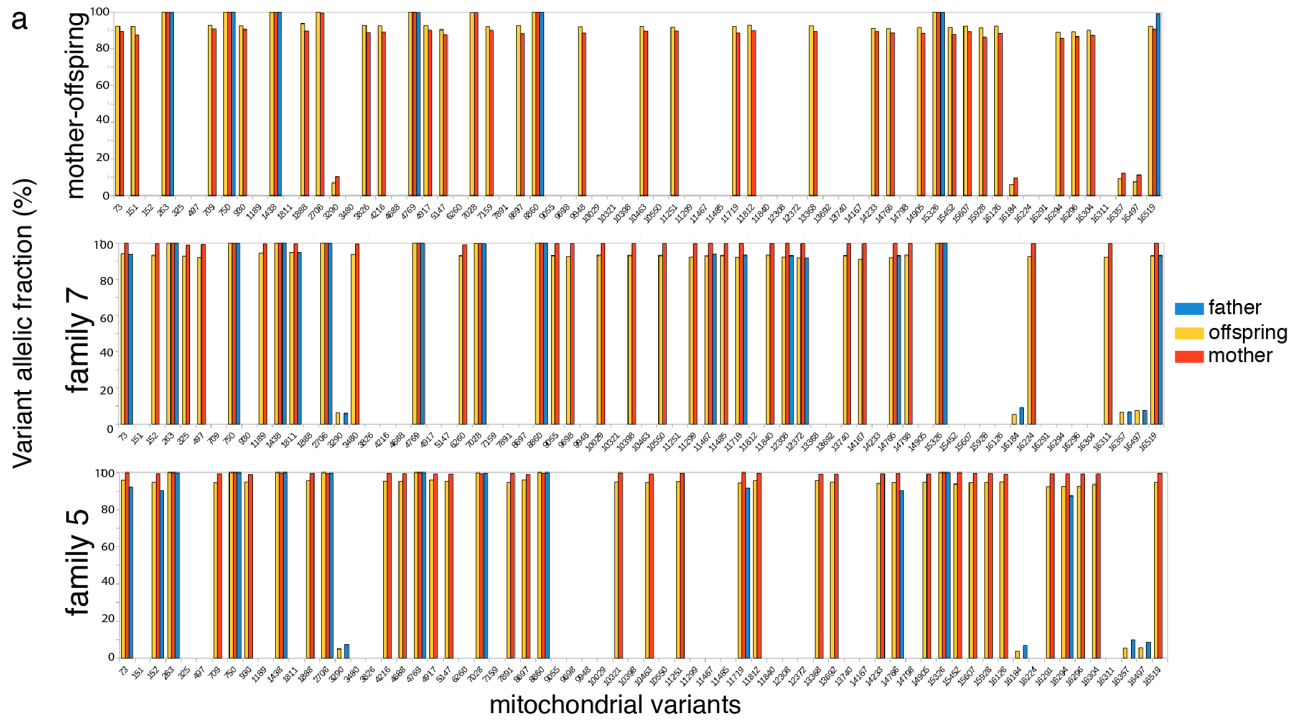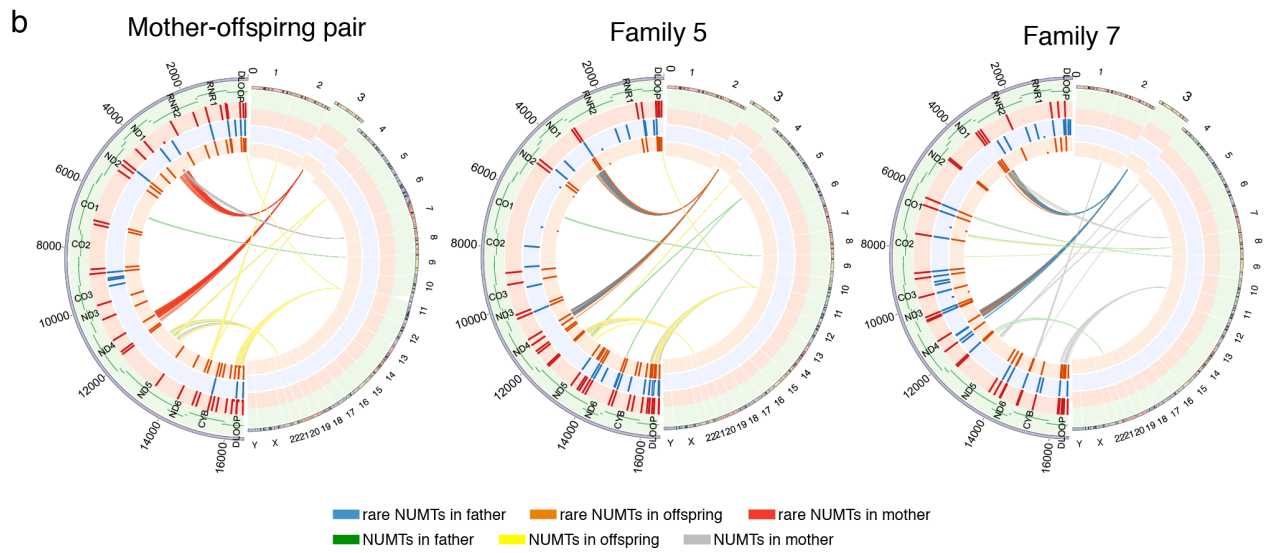

**Supplementary Figure 5. Mixed haplotype patterns and circos plots showing the variants and NUMTs observed in family 5, family 7 and one mother-offspring pair. (a)** Mixed haplotype patterns observed in family 5, family 7 and one mother-offspring pair. **(b)** Circos plots show the detected variants and NUMTs in family 5, family 7 and one mother-offspring pair. Circles from the outside to the inside indicate the following: (1) position of a variant on the mtDNA; (2) regions corresponding to the different mtDNA genes; (3) variants identified in the mother where the radial axis corresponds to the AF; (4) variants identified in the father; (5) variants identified in the offspring; (6) NUMTs observed in the family.

# Transmitted NUMTs in Family 8

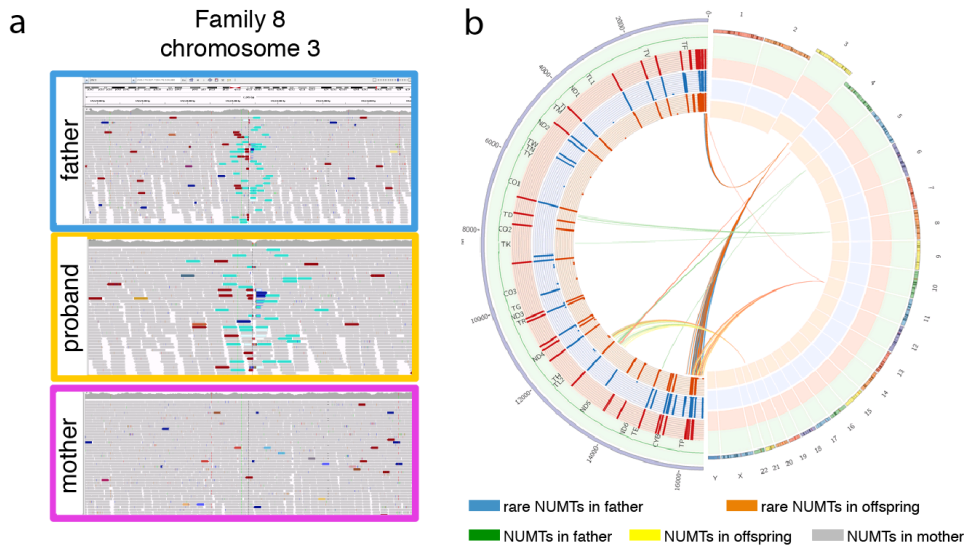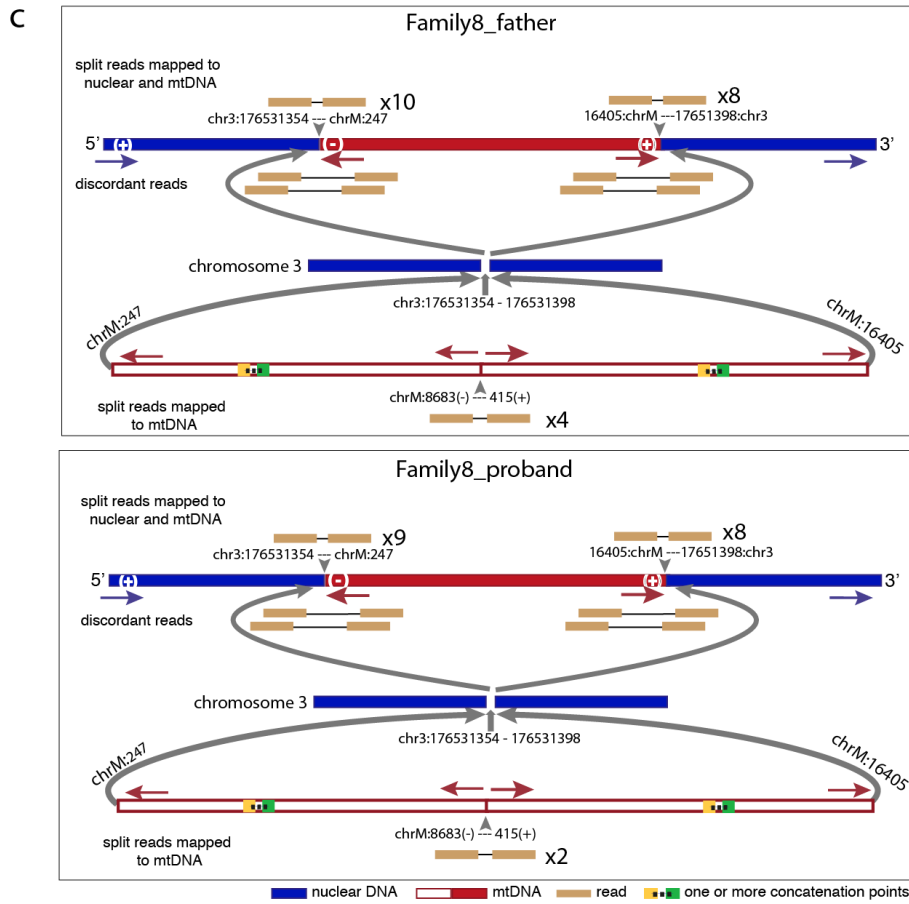

**Supplementary Figure 6. Variants and NUMTs observed in family 8 with father and proband carrying the mixed haplotype (haplotype fraction < 5%).** **(a)** IGV screenshots show aligned reads corresponding to NUMTs. Teal bars indicate the aligned reads which mapped to the nuclear DNA where their mates mapped to the mtDNA. **(b)** Circos plots shows the detected variants and NUMTs in each family. Circles from the outside to the inside indicate the following: (1) position of a variant on the mtDNA; (2) regions corresponding to the different mtDNA genes; (3) variants identified in the mother where the radial axis corresponds to the AF; (4) variants identified in the father; (5) variants identified in the offspring; (6) NUMTs observed in the family. **(c)** Split reads align to both nuclear DNA and mtDNA-derived sequences (top). Discordant reads are paired reads where one end aligns to mtDNA-derived and the other end aligns to nuclear DNA (middle). Possible constructed concatemer is shown at the bottom with observed supporting split reads. The positions of breakpoints (bp) are shown on both nuclear DNA (top) and mtDNA (bottom).



# nonTransmitted NUMTs in Family 9

a

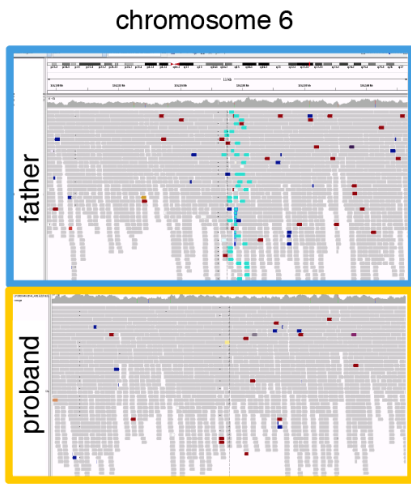

b

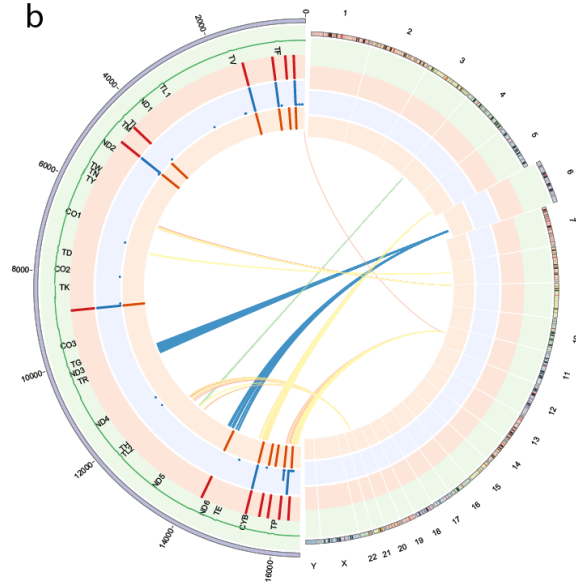

■ nuclear DNA    ■ mtDNA  
 ■ read    ■ one or more concatenation points

■ rare NUMTs in father    ■ NUMTs in father  
 ■ NUMTs in offspring    ■ NUMTs in mother

c

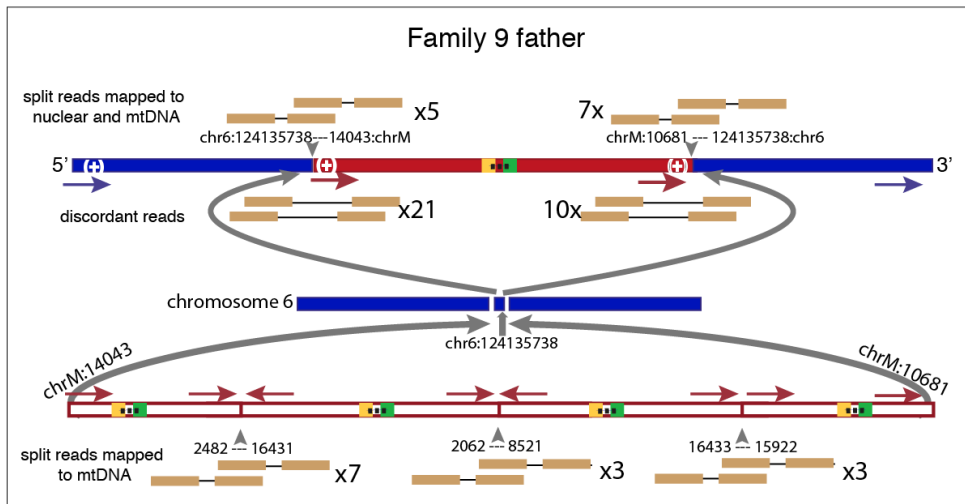

## nonTransmitted NUMTs in Family 10

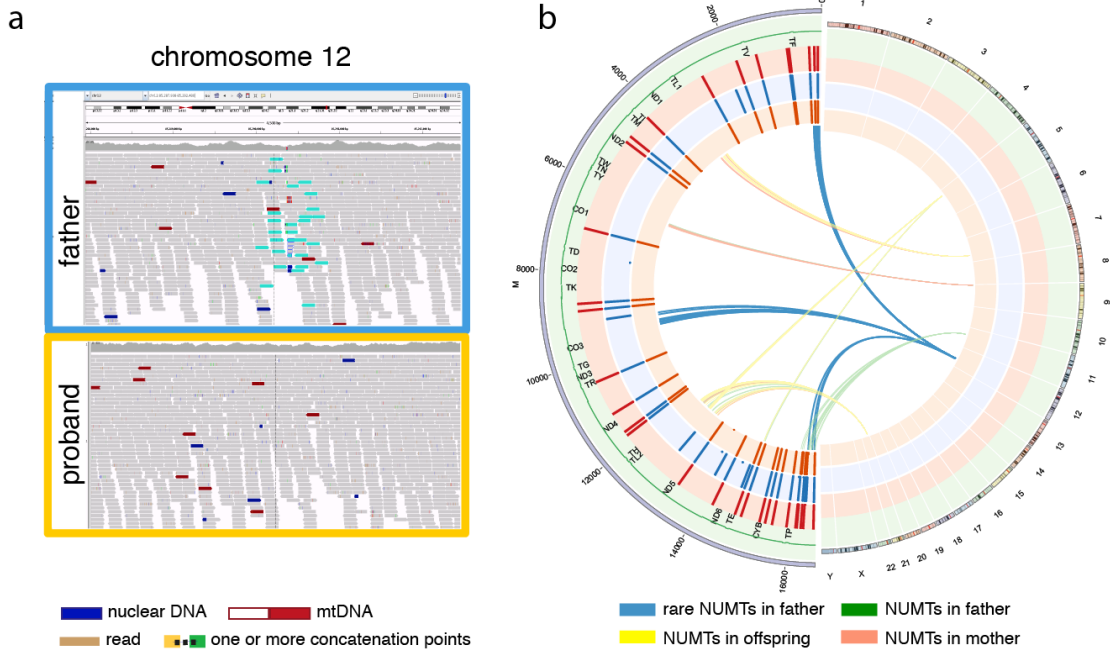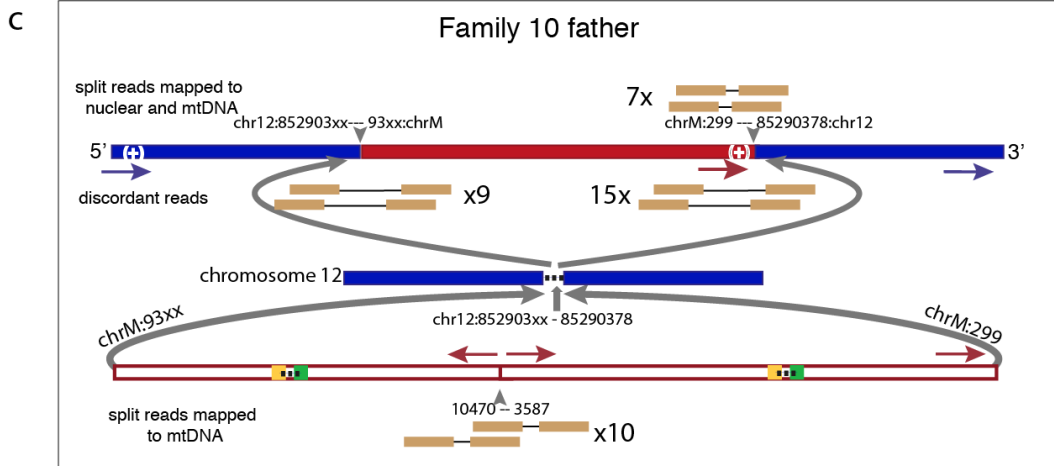

### nonTransmitted NUMTs in Family 11

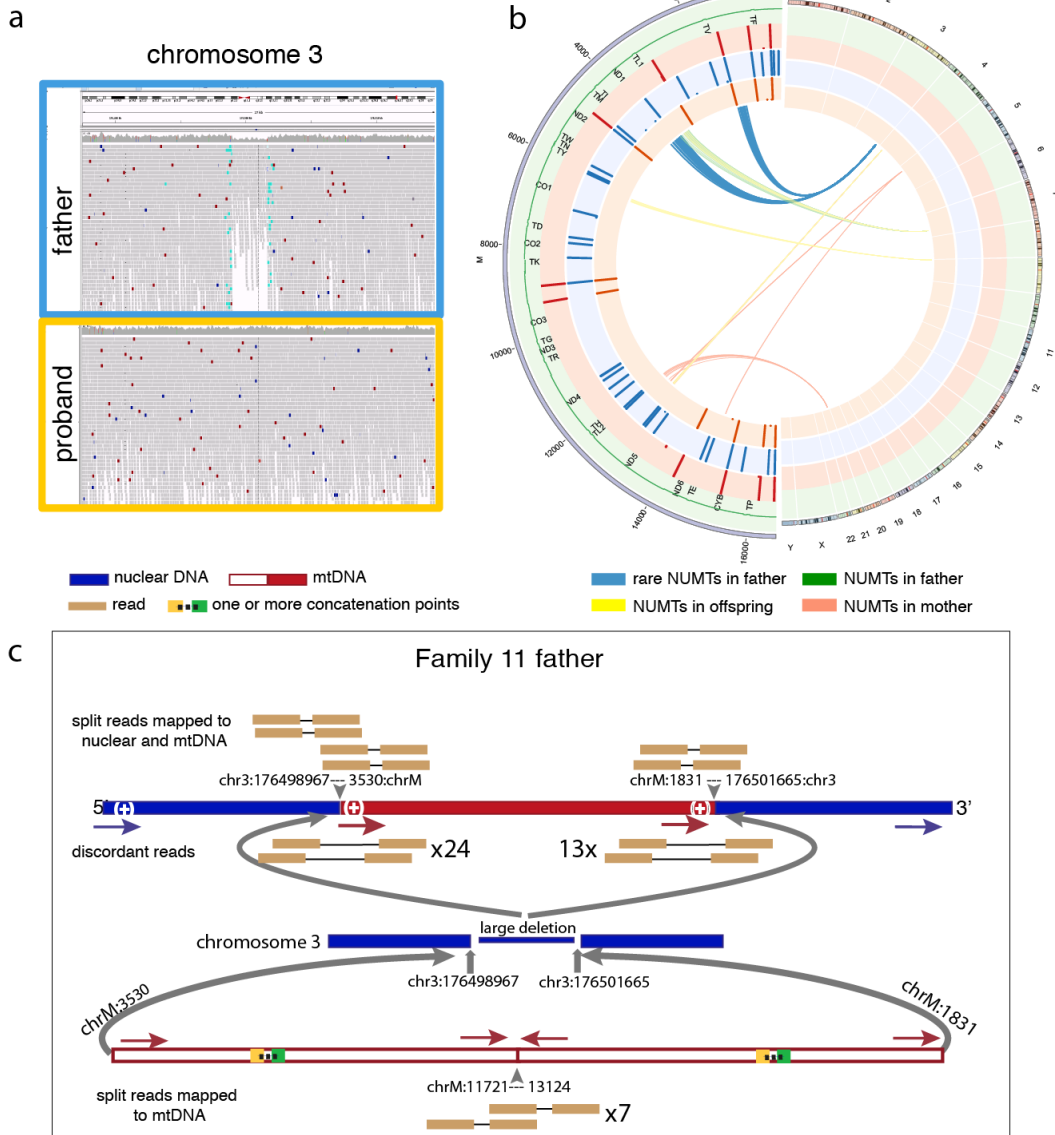

# nonTransmitted NUMTs in Family 12

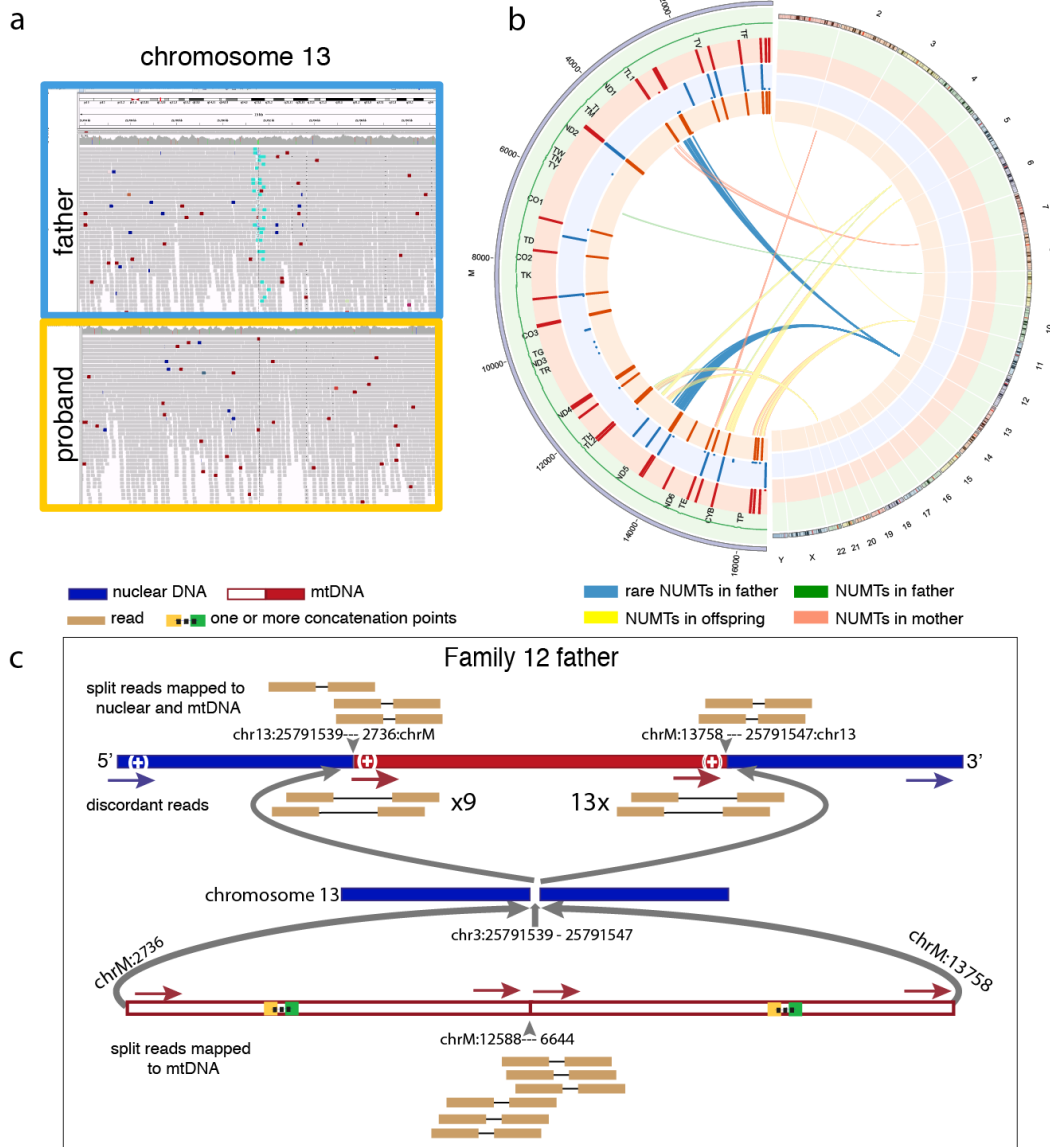

# nonTransmitted NUMTs in Family 13

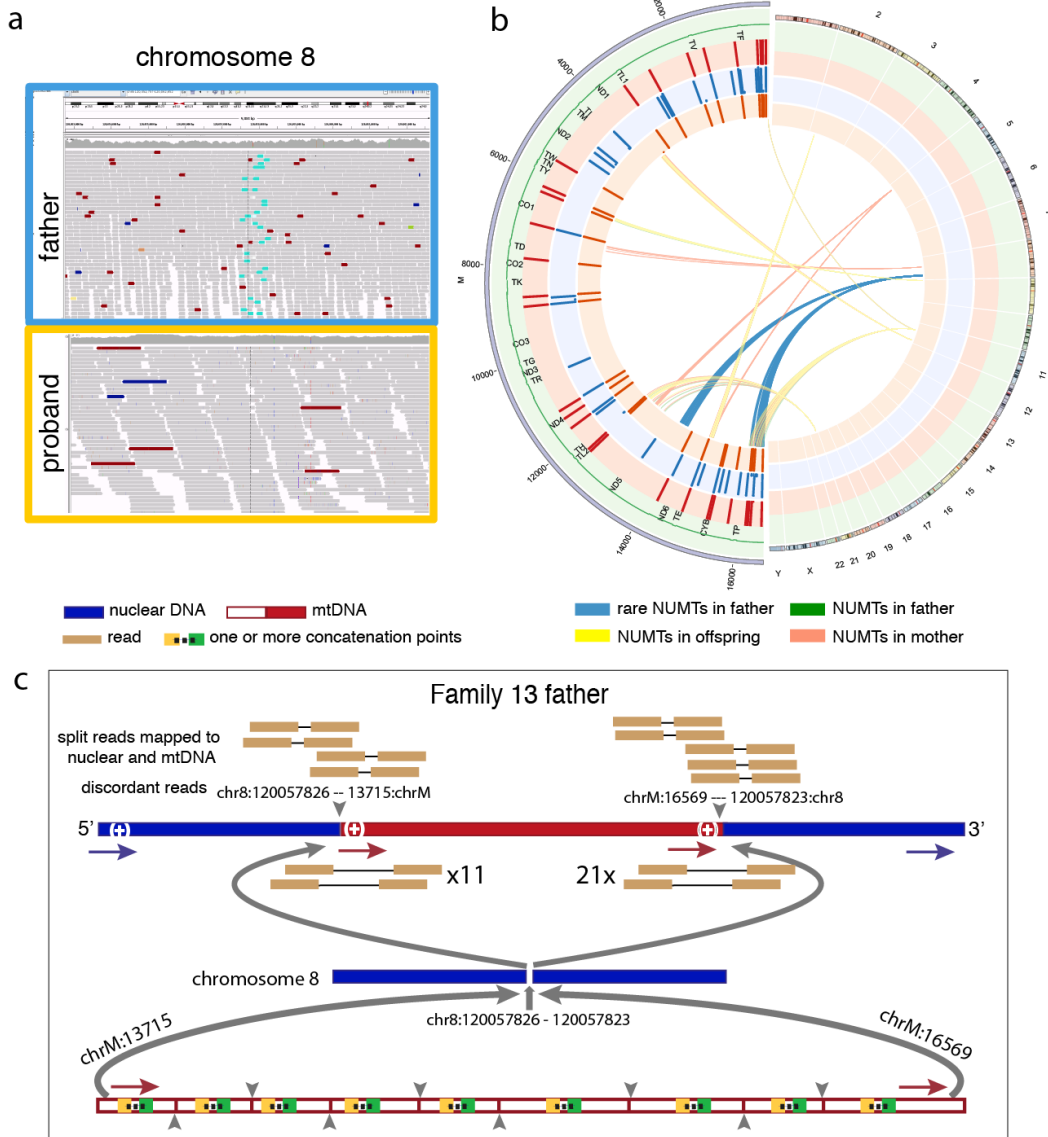

# nonTransmitted NUMTs in Family 14

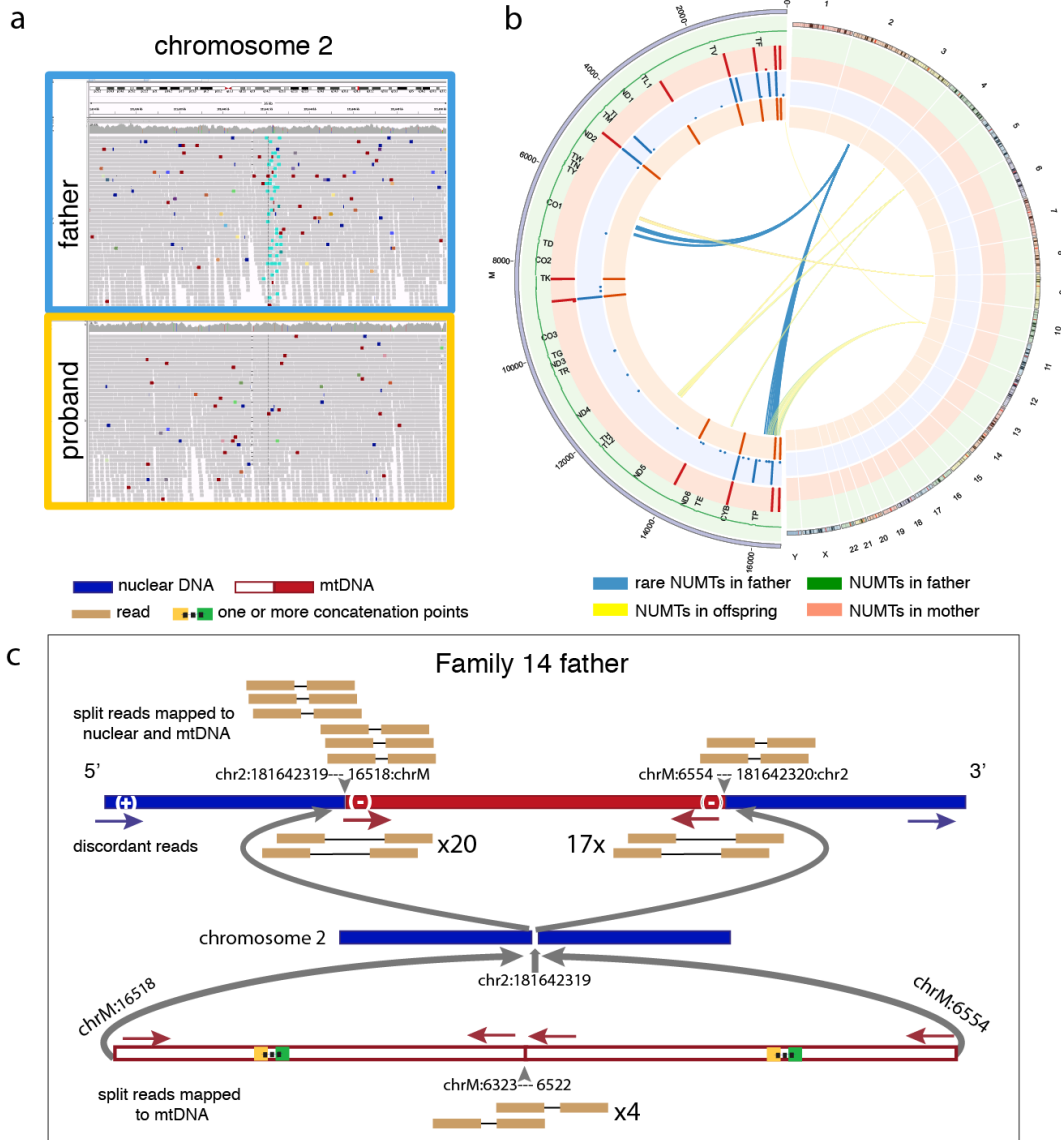

**Supplementary Figure 7 Variants and NUMTs observed in 6 fathers carrying non-transmitted mega-NUMTs.** (a) IGV screenshots show aligned reads corresponding to NUMTs. Teal bars indicate the aligned reads which mapped to the nuclear DNA where their mates mapped to the mtDNA. (b) Circos plots shows the detected variants and NUMTs in each family. Circles from the outside to the inside indicate the following: (1) position of a variant on the mtDNA; (2) regions corresponding to the different mtDNA genes; (3) variants identified in the mother where the radial axis corresponds to the AF; (4) variants identified in the father; (5) variants identified in the offspring; (6) NUMTs observed in the family. (c) Split reads align to both mtDNA-derived and nuclear DNA sequences (top). Discordant reads are paired reads where one end aligns to mtDNA-derived and the other end aligns to nuclear DNA (middle). Possible constructed concatemer is shown at the bottom with observed supporting split reads. The positions of breakpoints (bp) are shown on both nuclear DNA (top) and mtDNA (bottom).

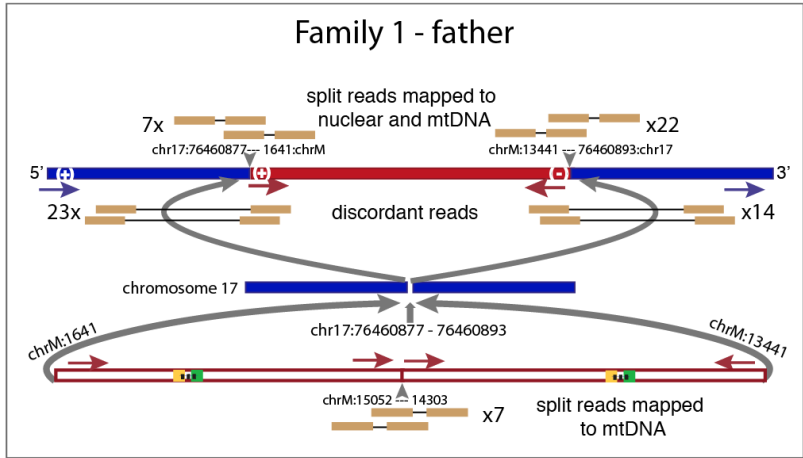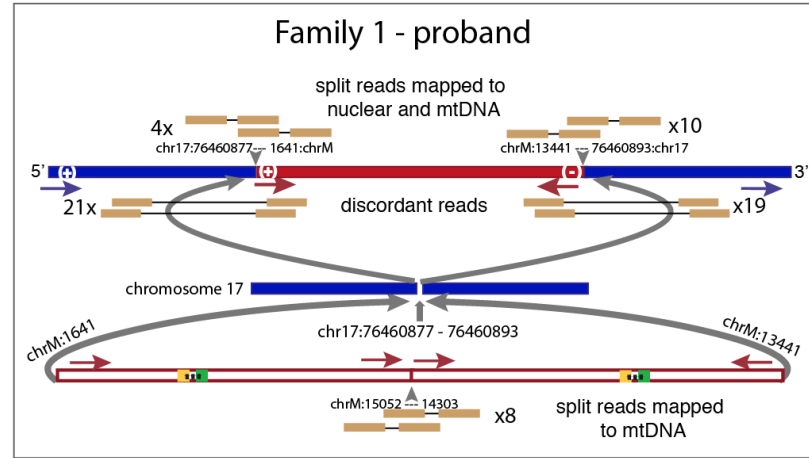

■ nuclear DNA ■ mtDNA ■ read ■ one or more concatenation points

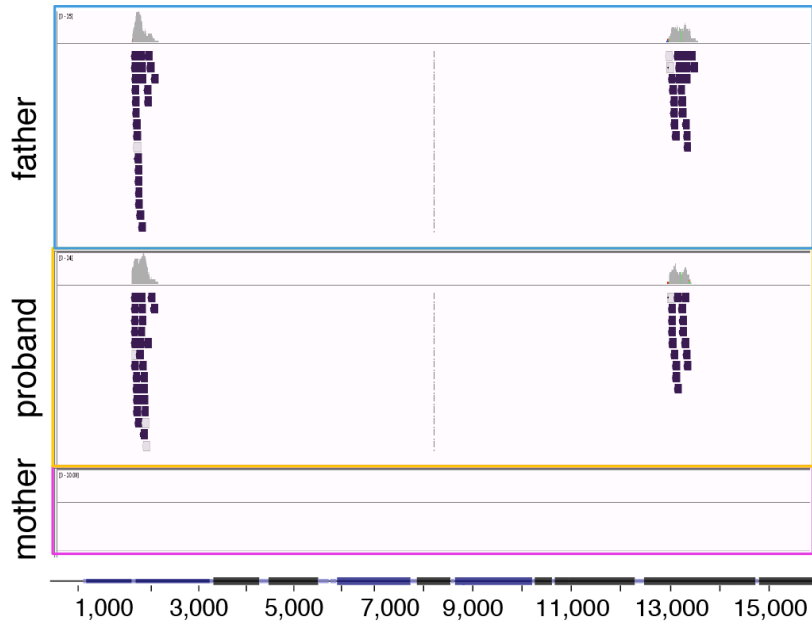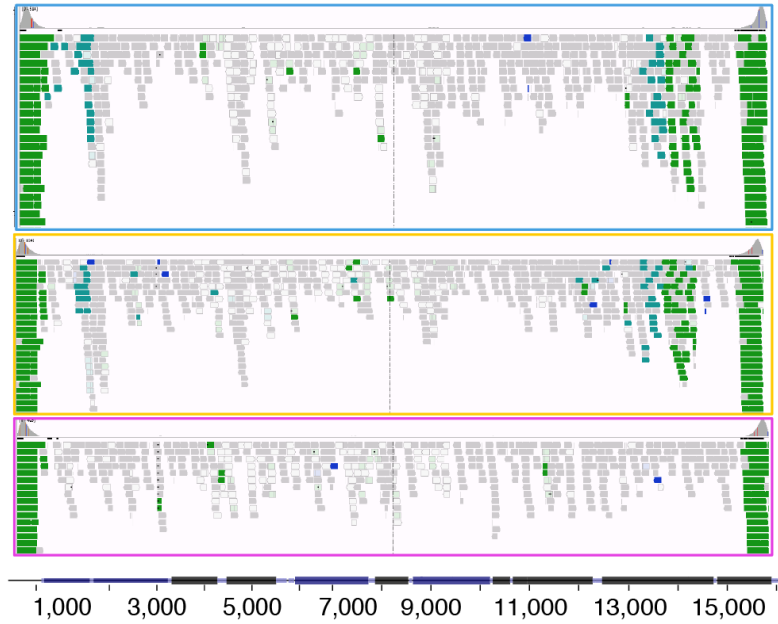



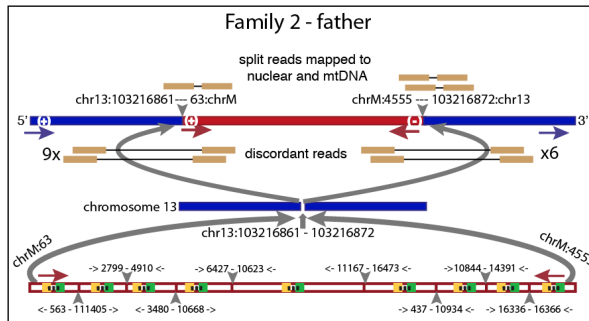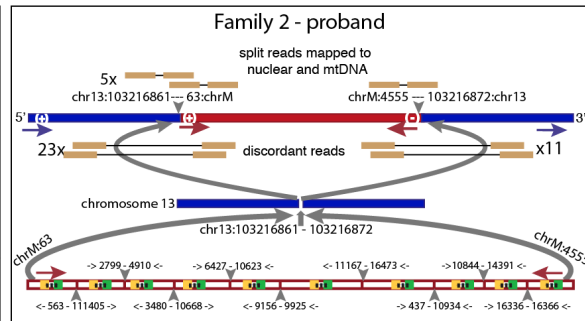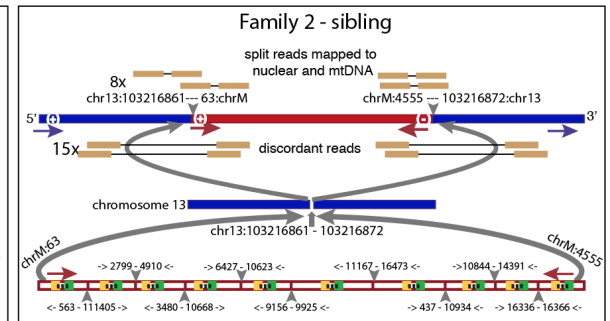

■ nuclear DNA ■ mtDNA ■ read ■ one or more concatenation points

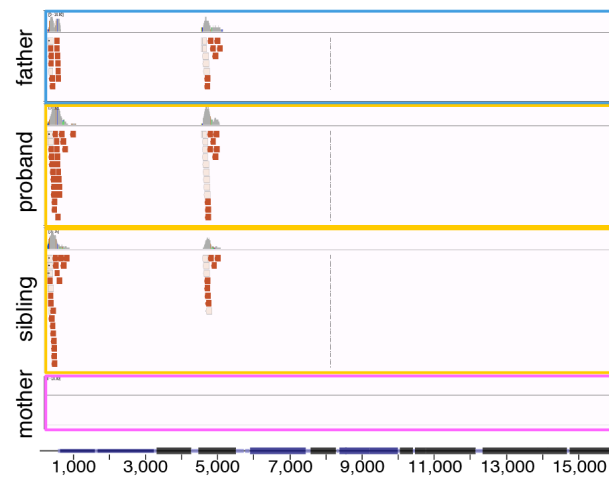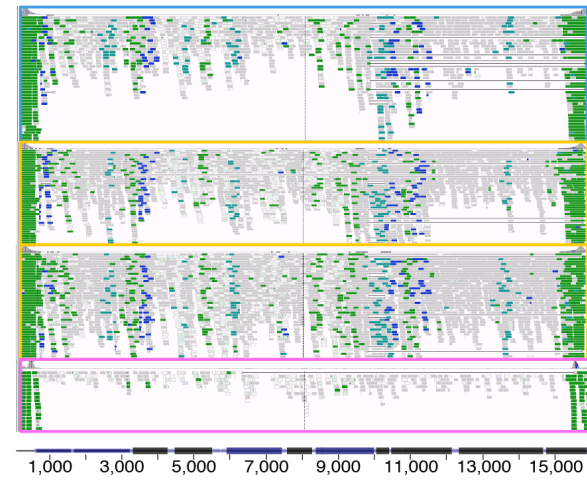

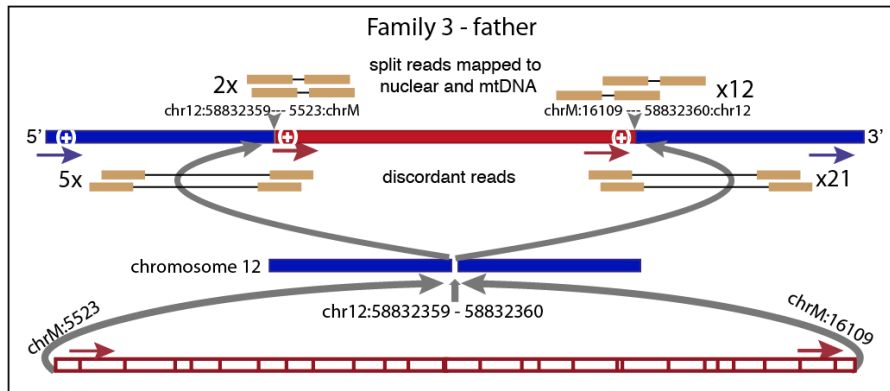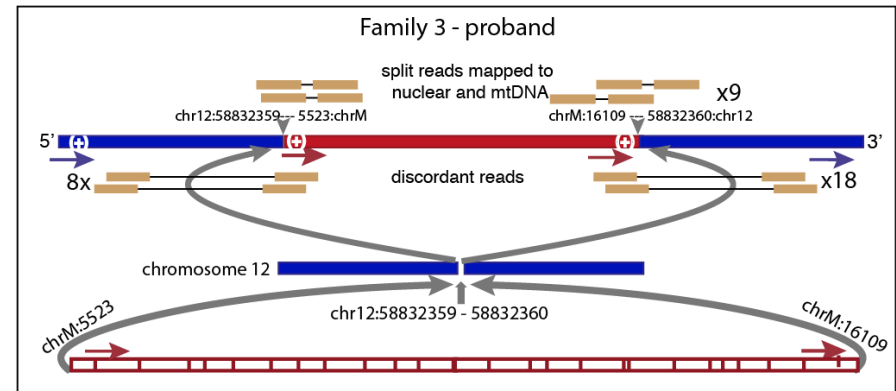

■ nuclear DNA ■ mtDNA ■ read ■ one or more concatenation points

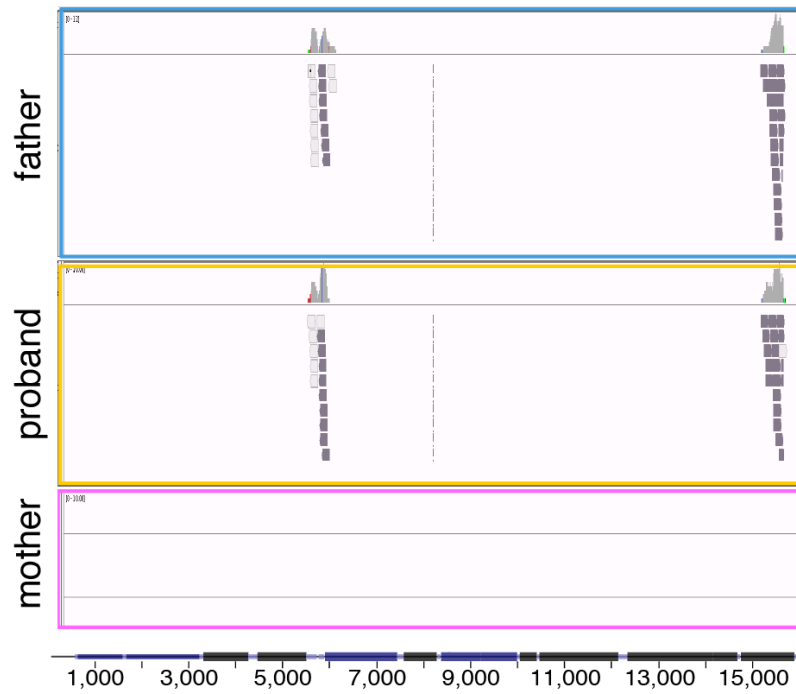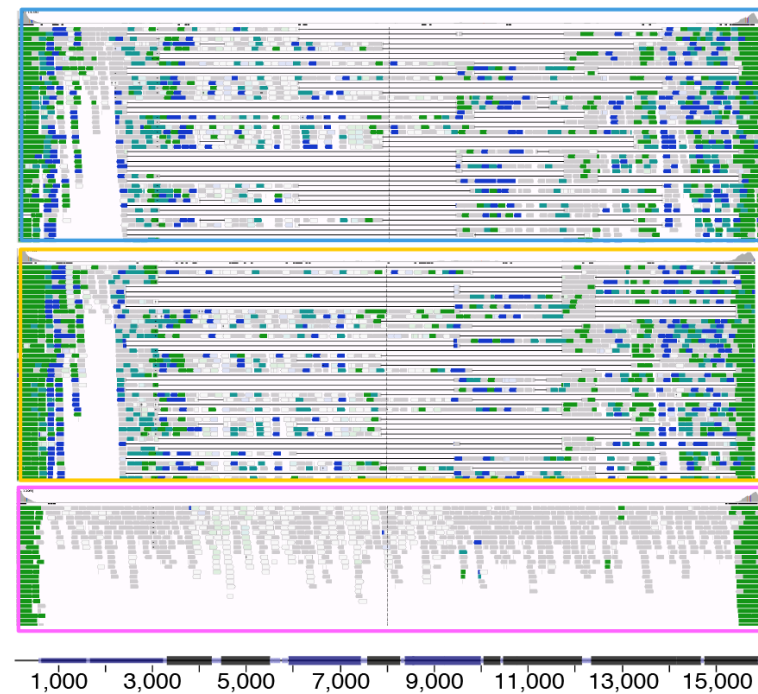

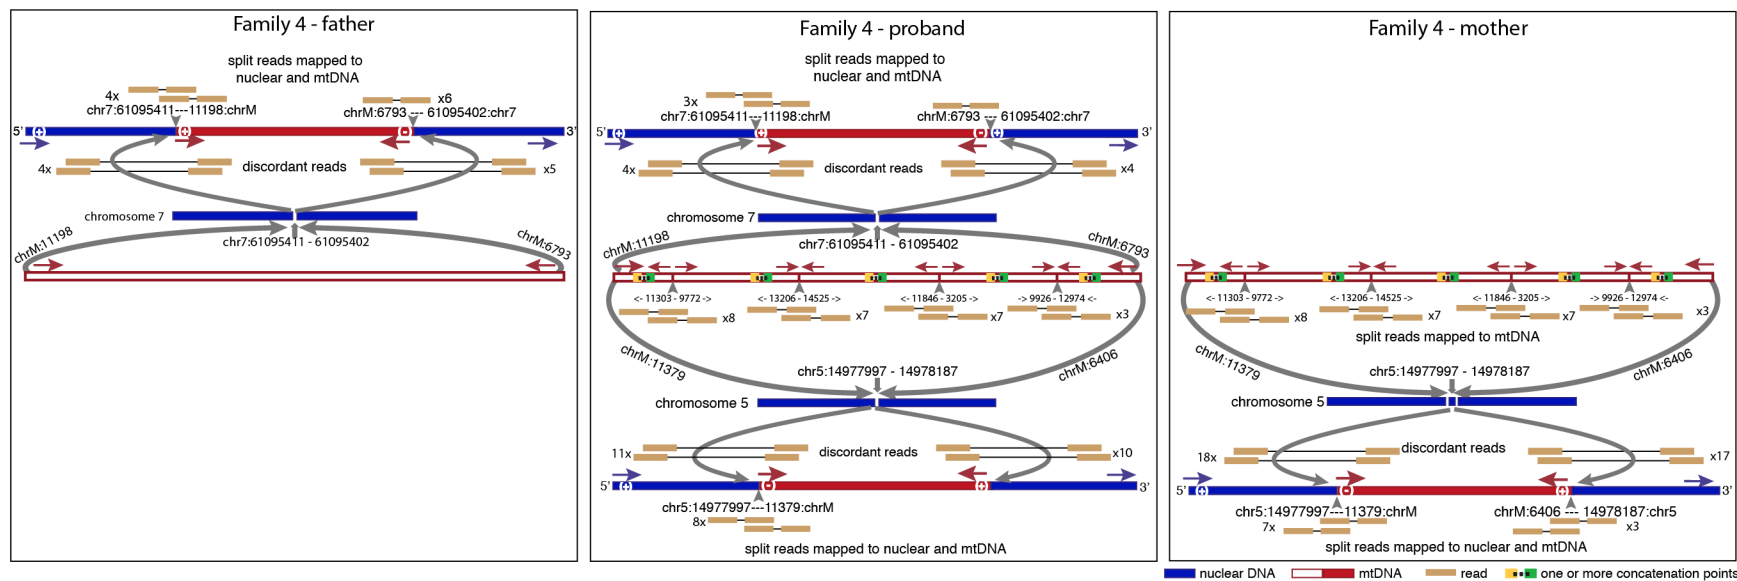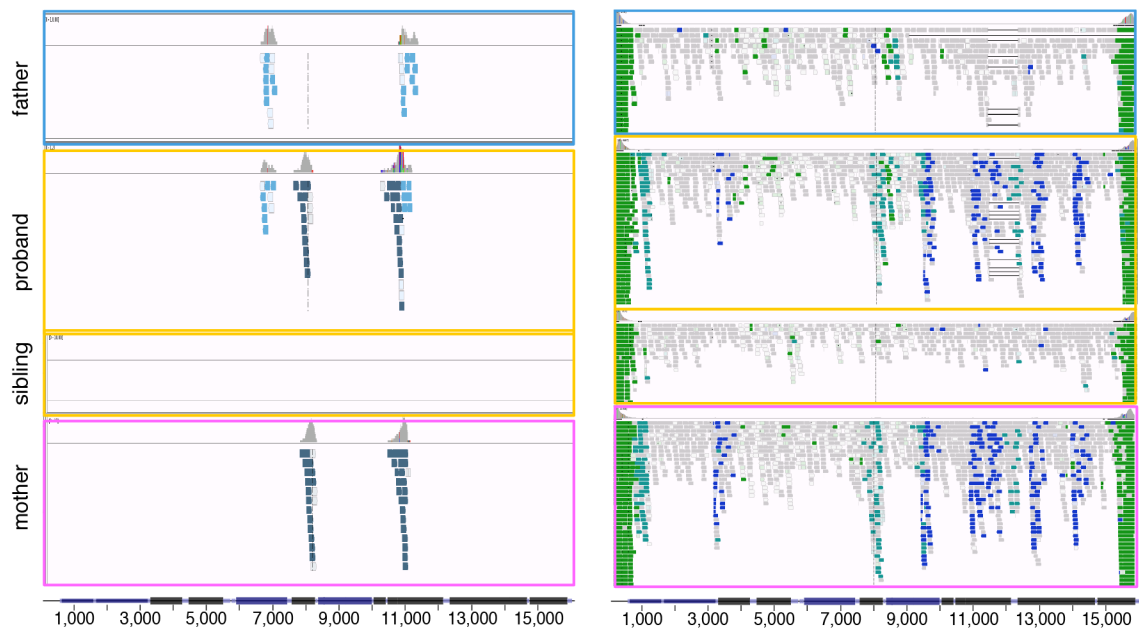

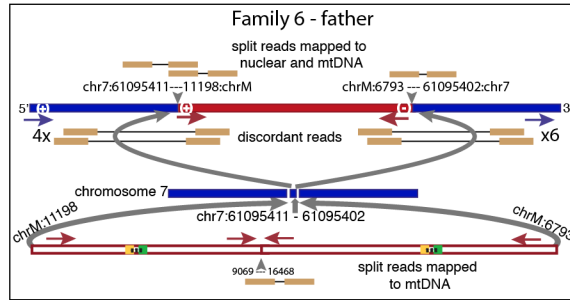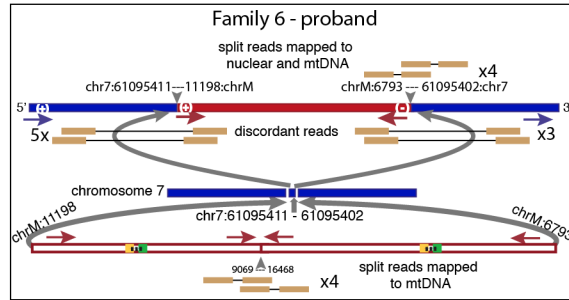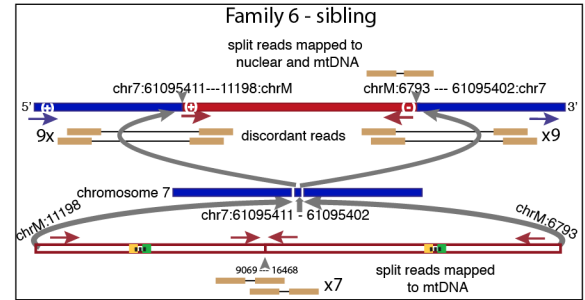

■ nuclear DNA ■ mtDNA ■ read ■ one or more concatenation points

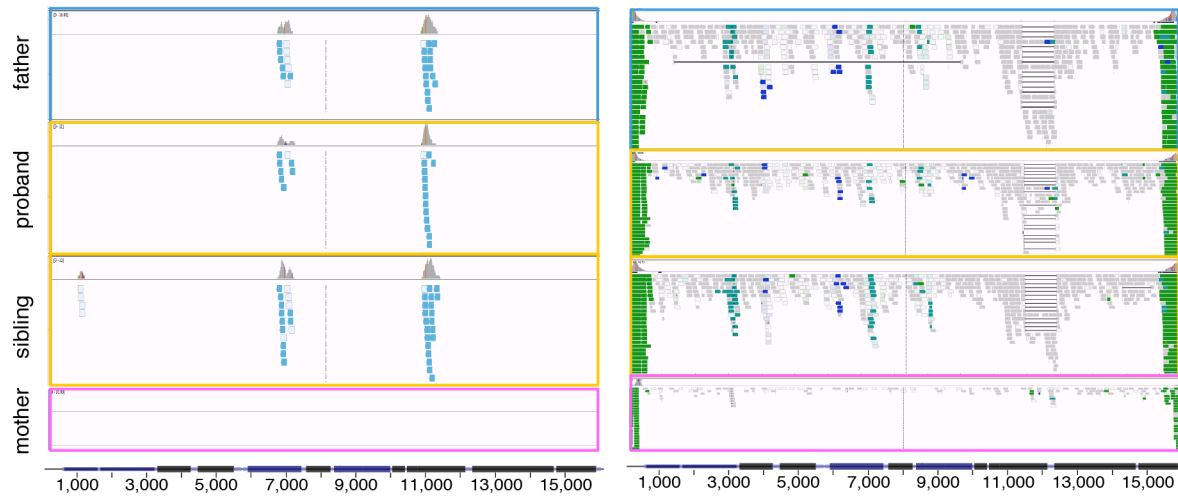

**Supplementary Figure 8 Defining mega-NUMTs in 5 families.** Within each family, split reads align to both nuclear DNA and mtDNA-derived sequences (top). Discordant reads are paired reads where one end aligns to mtDNA-derived and the other end aligns to nuclear DNA (middle). Possible constructed concatemer is shown at the bottom with observed supporting split reads. The positions of breakpoints (bp) are shown on both nuclear DNA (top) and mtDNA (bottom). (Bottom) Left: IGV screenshots show the alignment of the discordant and split reads corresponding to the mega-NUMTs on the mtDNA-derived sequence. The chromosomes on which their mates are found are shown in different colors. Right: IGV screenshots show the alignment of split reads aligned to mtDNA only. The reads are colored by pair orientation. Many read pairs with anomalous pair orientations in the fathers and probands support the mtDNA-derived rearrangement. In family 4, proband also inherited another mega-NUMT from the mother. Both mother and proband carried the same mtDNA-derived junctions. The mtDNA genome position track from UCSC genome browser is shown at the bottom.

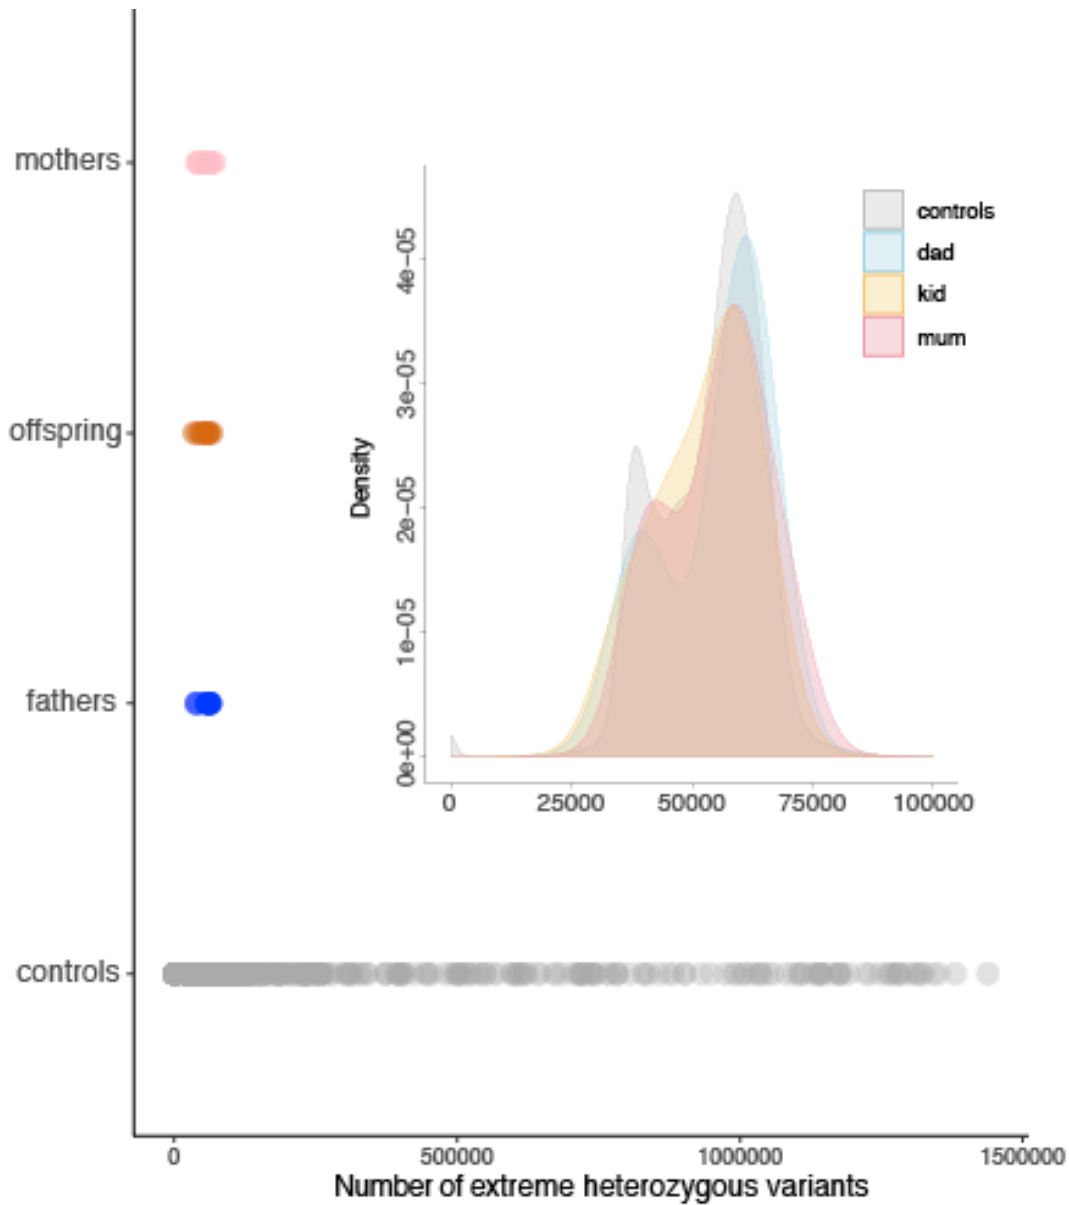

**Supplementary Figure 9. Number of extreme heterozygous variants.** Father, mother and offspring from 7 families carrying mixed haplotypes are shown in different colors. The numbers of extreme heterozygous variants from the remaining individuals in the whole dataset are shown at the bottom in grey circles. The distributions of number of extreme heterozygous variants from mother, father, offspring in 7 families and the whole dataset are shown in the middle.

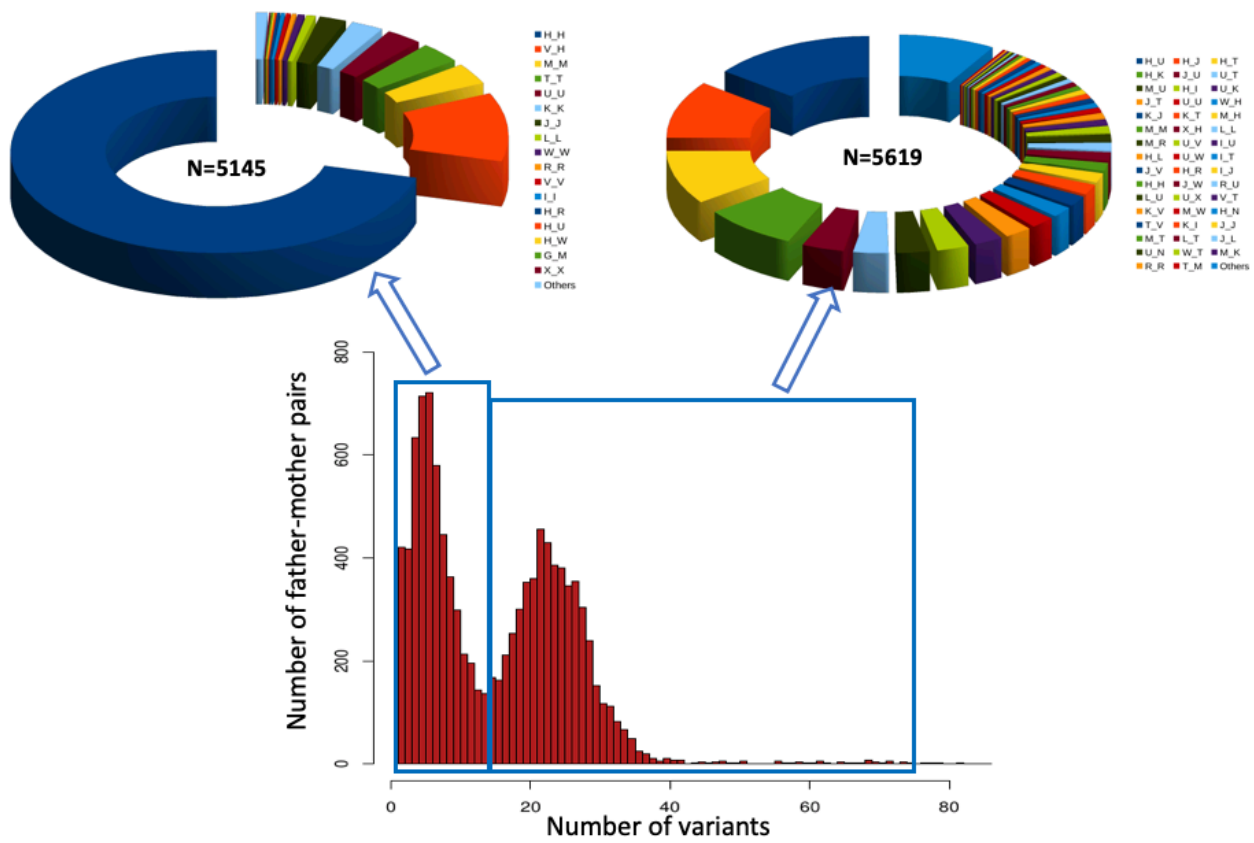

**Supplementary Figure 10 Distribution of mitochondrial haplogroups between each father-mother pair.** The left pie chart shows the father-mother pairs with fewer than 14 variants which are only present in the fathers. The right pie chart shows the father-mother pairs with at least 14 variants which are only present in the fathers.

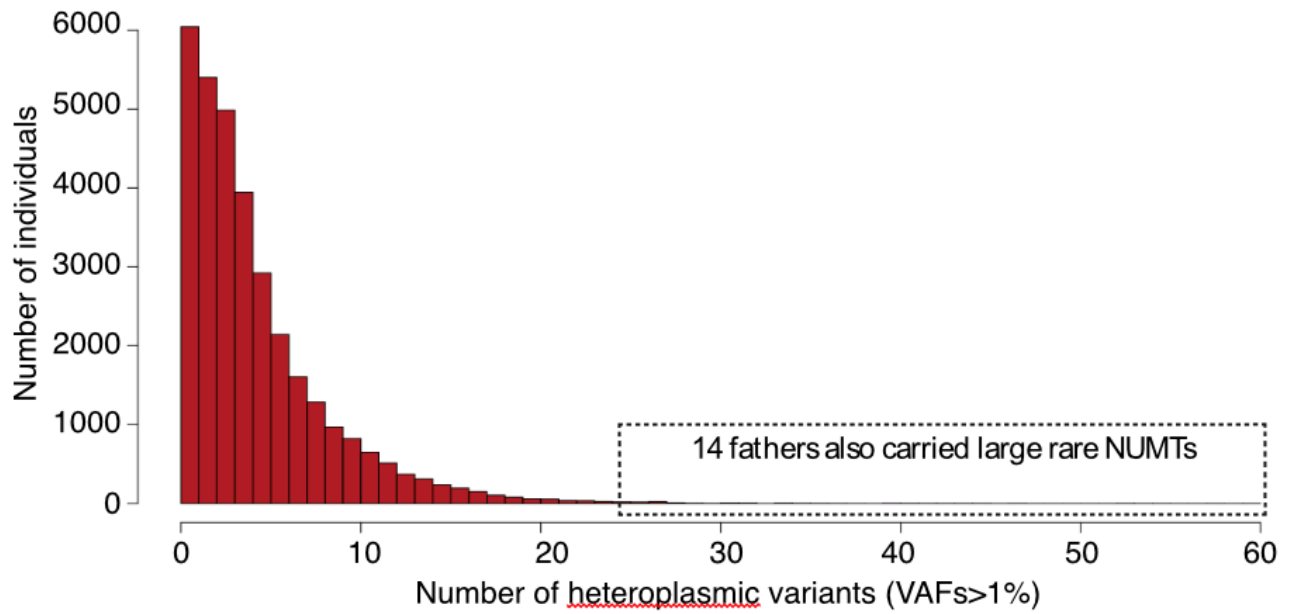

**Supplementary Figure 11 Distribution of number of heteroplasmic variants (AFs>1%) per mtDNA sequence.** All 14 fathers carrying mega-NUMTs harbored more than 23 heteroplasmic variants.



## Supplementary Tables

**Supplementary Table 1.** Summary of non-transmitted mega-NUMTs in 6 fathers.

| <b>FatherID</b> | <b>Junction1 (hg38)</b> |              | <b>Junction2 (hg38)</b> |              | <b>DCRs</b> | <b>Father</b> |                    |
|-----------------|-------------------------|--------------|-------------------------|--------------|-------------|---------------|--------------------|
|                 | <b>Nuclear</b>          | <b>mtDNA</b> | <b>Nuclear</b>          | <b>mtDNA</b> |             | <b>SPRs</b>   | <b>mtJunctions</b> |
| <b>Family9</b>  | chr6:124135738          | 10681(+)     | chr6:124135738          | 14043(+)     | 31          | 12            | 3                  |
| <b>Family10</b> | chr12:852903xx          | 93xx         | chr12:85290378          | 299(+)       | 24          | 7             | 1                  |
| <b>Family11</b> | chr3:176498967          | 3530(+)      | chr3:176501665          | 1831(+)      | 37          | 6             | 1                  |
| <b>Family12</b> | chr13:25791539          | 2736(+)      | chr13:25791547          | 13758(+)     | 22          | 5             | 1                  |
| <b>Family13</b> | chr8:120057826          | 13715(+)     | chr8:120057823          | 16569(+)     | 32          | 9             | 8                  |
| <b>Family14</b> | chr2:181642319          | 16518(-)     | chr2:181642320          | 6554(-)      | 37          | 8             | 1                  |

DCRs = discordant reads; SPRs = split reads.

**Supplementary Table 2.** Summary of breakpoints within mtDNA-derived fragments.

| <b>Family ID</b> | <b>No. of breakpoints within mtDNA-derived fragments</b> |                |                |               |
|------------------|----------------------------------------------------------|----------------|----------------|---------------|
|                  | <b>father</b>                                            | <b>proband</b> | <b>sibling</b> | <b>mother</b> |
| Family1          | 1                                                        | 1              | NA             | 0             |
| Family2          | 8                                                        | 9              | 9              | 0             |
| Family3          | 32                                                       | 32             | NA             | 0             |
| Family4          | 0                                                        | 4              | 0              | 4             |
| Family5          | 3                                                        | 2              | NA             | 0             |
| Family6          | 1                                                        | 1              | 1              | 0             |
| Family7          | 3                                                        | 3              | NA             | 0             |
| Family8          | 1                                                        | 1              | NA             | 0             |
| Family9          | 3                                                        | 0              | NA             | 0             |
| Family10         | 1                                                        | 0              | NA             | 0             |
| Family11         | 1                                                        | 0              | NA             | 0             |
| Family12         | 1                                                        | 0              | NA             | 0             |
| Family13         | 8                                                        | 0              | NA             | 0             |
| Family14         | 1                                                        | 0              | NA             | 0             |

NA: samples are not available

**Supplementary Table 3.** Validation of NUMTs observed in short-read sequencing by long-read (Oxford Nanopore PromethION) sequencing.

| NUMTs<br>ID | Junction1 (GRCh37) |                | Junction2 (GRCh37) |                 | Length<br>(bp) | Individual IDs* |   |   |   |   |
|-------------|--------------------|----------------|--------------------|-----------------|----------------|-----------------|---|---|---|---|
|             | Nuclear            | mtDNA          | Nuclear            | mtDNA           |                | 1               | 2 | 3 | 4 | 5 |
| 1           | 2:33892482         | 15022(-)       | 2:33892479         | 14776(-)        | 246            |                 |   | Y |   | Y |
| 2           | 2:212977624        | 10368(-)       | 2:212977626        | 9187(-)         | 1181           |                 |   |   | Y |   |
| 3           | 4:29441247         | 12997(-)       | 4:29441248         | 12834(-)        | 163            | Y               | Y |   | Y |   |
| 4           | 4:190598242        | 12360(+)       | -                  | 13227(+)        | 867            | Y               | Y |   |   |   |
| 5           | 5:32338583         | 14803-14977(+) | 5:32338584         | 12864-12714 (-) | 324            | Y               |   | Y |   | Y |
| 6           | 8:63015431         | 8553(-)        | 8:63015423         | 7083(-)         | 1470           |                 | Y | Y | Y | Y |
| 7           | 8:82385249         | 15834(+)       | 8:82385262         | 3108(+)         | 3843           |                 |   |   |   | Y |
| 8           | 9:129775           | 6420(-)        | 9:129767           | 6224(-)         | 196            | Y               | Y | Y |   |   |
| 9           | 11:49883569        | 61(-)          | 11:49883572        | 16088(-)        | 542            | Y               | Y |   | Y | Y |

\* if Y in the cell, NUMT (each row represents a unique NUMT) is observed in an individual (sample IDs are listed in the last 5 columns).

**Supplementary Table 4** Estimated number of copies of the mtDNA-derived fragment (No) within the NUMT in 7 families.

| Family1 |    |         |    | Family2 |    |         |    |         |    | Family3 |    |         |    | Family4 |    |         |    |         |    |
|---------|----|---------|----|---------|----|---------|----|---------|----|---------|----|---------|----|---------|----|---------|----|---------|----|
| father  |    | proband |    | father  |    | proband |    | sibling |    | father  |    | proband |    | father  |    | proband |    | sibling |    |
| POS     | No | POS     | No | POS     | No | POS     | No | POS     | No | POS     | No | POS     | No | POS     | No | POS     | No | POS     | No |
| 73      | 2  | 189     | 3  | 146     | 9  | 146     | 8  | 146     | 9  | 73      | 3  | 73      | 3  | 152     | 19 | 143     | 21 | 152     | 19 |
| 150     | 3  | 195     | 3  | 199     | 9  | 827     | 7  | 827     | 8  | 489     | 5  | 489     | 6  | 199     | 19 | 152     | 20 | 199     | 19 |
| 152     | 3  | 204     | 3  | 489     | 5  | 4820    | 7  | 4820    | 9  | 2706    | 5  | 750     | 8  | 489     | 11 | 373     | 12 | 489     | 11 |
| 271     | 3  | 207     | 4  | 827     | 8  | 5465    | 10 | 5465    | 11 | 3736    | 6  | 1438    | 8  | 3780    | 12 | 1598    | 14 | 3780    | 12 |
| 295     | 2  | 489     | 2  | 3606    | 8  | 6719    | 11 | 6719    | 12 | 3745    | 6  | 2706    | 7  | 6366    | 12 | 3864    | 14 | 6366    | 12 |
| 489     | 2  | 1243    | 3  | 4071    | 10 | 7521    | 8  | 7521    | 10 | 4823    | 6  | 3736    | 7  | 8450    | 16 | 4062    | 15 | 8450    | 16 |
| 709     | 2  | 2483    | 3  | 4820    | 10 | 8392    | 11 | 8392    | 11 | 5786    | 6  | 3745    | 7  | 8594    | 15 | 4225    | 16 | 8594    | 15 |
| 2706    | 3  | 3398    | 3  | 4850    | 11 | 9101    | 9  | 9101    | 10 | 6956    | 6  | 4080    | 7  | 8701    | 18 | 5836    | 19 | 8701    | 18 |
| 11719   | 3  | 3505    | 3  | 5442    | 12 | 9123    | 10 | 9123    | 11 | 7028    | 5  | 4754    | 8  | 9452    | 9  | 7490    | 16 | 9452    | 9  |
| 12612   | 3  | 5046    | 4  | 6455    | 11 | 10238   | 8  | 10238   | 9  | 7621    | 7  | 4769    | 8  | 9540    | 14 | 8584    | 14 | 9540    | 14 |
| 13708   | 2  | 5460    | 3  | 7521    | 9  | 11239   | 8  | 11239   | 9  | 8251    | 4  | 4823    | 7  | 10398   | 14 | 8594    | 14 | 10398   | 14 |
| 14766   | 3  | 8994    | 3  | 8701    | 11 | 11914   | 8  | 11914   | 9  | 8701    | 6  | 5786    | 8  | 10400   | 14 | 8805    | 14 | 10400   | 14 |
| 15452   | 2  | 11674   | 3  | 9101    | 9  | 12239   | 8  | 12239   | 10 | 9058    | 7  | 6956    | 6  | 10754   | 13 | 9174    | 13 | 10754   | 13 |
| 16069   | 2  | 11947   | 3  | 9540    | 11 | 13590   | 8  | 13590   | 10 | 9355    | 6  | 7028    | 5  | 10873   | 16 | 9181    | 13 | 10873   | 16 |
| 16126   | 3  | 12414   | 4  | 9824    | 11 | 14221   | 9  | 14221   | 10 | 9540    | 7  | 8251    | 6  | 11293   | 14 | 9452    | 8  | 11293   | 14 |
| 16278   | 3  | 12705   | 3  | 10398   | 10 | 14587   | 7  | 14587   | 10 | 10398   | 7  | 8701    | 8  | 11732   | 18 | 10631   | 15 | 11732   | 18 |
| 16356   | 4  | 15884   | 4  | 10400   | 10 | 15326   | 8  | 15326   | 9  | 10400   | 7  | 9180    | 8  | 13635   | 16 | 10754   | 12 | 13635   | 16 |
| 16519   | 1  | 16223   | 4  | 10873   | 9  | 15535   | 7  | 15535   | 8  | 10873   | 5  | 9540    | 6  | 13971   | 13 | 11009   | 10 | 13971   | 13 |
|         |    | 16292   | 4  | 11239   | 8  | 15746   | 10 | 15746   | 12 | 11719   | 4  | 10398   | 8  | 14040   | 13 | 11293   | 13 | 14040   | 13 |
|         |    |         |    | 11665   | 9  | 16136   | 7  | 16136   | 7  | 12705   | 7  | 10400   | 8  | 14544   | 13 | 12406   | 16 | 14544   | 13 |
|         |    |         |    | 11914   | 9  | 16172   | 4  | 16172   | 5  | 13145   | 4  | 10873   | 7  | 14783   | 13 | 13236   | 19 | 14783   | 13 |
|         |    |         |    | 12091   | 10 | 16175   | 4  | 16175   | 4  | 14061   | 6  | 11719   | 6  | 14990   | 13 | 13635   | 18 | 14990   | 13 |
|         |    |         |    | 12705   | 12 | 16218   | 5  | 16218   | 4  | 14766   | 6  | 12705   | 9  | 15043   | 15 | 13971   | 10 | 15043   | 15 |
|         |    |         |    | 13590   | 9  | 16261   | 8  | 16261   | 8  | 14783   | 6  | 13145   | 7  | 15301   | 13 | 14040   | 15 | 15301   | 13 |
|         |    |         |    | 14587   | 8  |         |    |         |    | 15043   | 7  | 14061   | 6  | 15385   | 12 | 14194   | 17 | 15385   | 12 |
|         |    |         |    | 14783   | 9  |         |    |         |    | 15119   | 6  | 14766   | 7  | 15900   | 15 | 14305   | 17 | 15900   | 15 |
|         |    |         |    | 15043   | 10 |         |    |         |    | 15301   | 7  | 14783   | 7  | 16093   | 28 | 14544   | 16 | 16093   | 28 |
|         |    |         |    | 15236   | 8  |         |    |         |    | 15622   | 7  | 15043   | 7  | 16129   | 15 | 14577   | 18 | 16129   | 15 |
|         |    |         |    | 15301   | 9  |         |    |         |    | 15777   | 5  | 15119   | 7  | 16223   | 17 | 14990   | 11 | 16223   | 17 |
|         |    |         |    | 15535   | 6  |         |    |         |    | 16223   | 7  | 15301   | 6  | 16225   | 17 | 15385   | 15 | 16225   | 17 |
|         |    |         |    | 16136   | 7  |         |    |         |    | 16362   | 8  | 15622   | 8  | 16234   | 18 | 15777   | 20 | 16234   | 18 |
|         |    |         |    | 16223   | 6  |         |    |         |    | 16519   | 3  | 16223   | 9  | 16266   | 16 | 16266   | 19 | 16266   | 16 |
|         |    |         |    | 16295   | 9  |         |    |         |    |         |    | 16235   | 10 | 16304   | 16 | 16298   | 19 | 16304   | 16 |
|         |    |         |    | 16324   | 9  |         |    |         |    |         |    | 16291   | 8  | 16325   | 17 | 16299   | 19 | 16325   | 17 |
|         |    |         |    | 16362   | 9  |         |    |         |    |         |    | 16311   | 8  | 16356   | 19 | 16304   | 20 | 16356   | 19 |
|         |    |         |    |         |    |         |    |         |    |         |    | 16362   | 7  | 16392   | 21 | 16311   | 8  | 16392   | 21 |
|         |    |         |    |         |    |         |    |         |    |         |    |         |    |         |    | 16325   | 12 |         |    |
|         |    |         |    |         |    |         |    |         |    |         |    |         |    |         |    | 16356   | 19 |         |    |
|         |    |         |    |         |    |         |    |         |    |         |    |         |    |         |    | 16456   | 6  |         |    |
|         |    |         |    |         |    |         |    |         |    |         |    |         |    |         |    | 16524   | 4  |         |    |

| Family5 |    |         |    | Family6 |    |         |    |         |    | Family7 |    |         |    |
|---------|----|---------|----|---------|----|---------|----|---------|----|---------|----|---------|----|
| father  |    | proband |    | father  |    | proband |    | sibling |    | father  |    | proband |    |
| POS     | No | POS     | No | POS     | No | POS     | No | POS     | No | POS     | No | POS     | No |
| 73      | 5  | 152     | 10 | 143     | 23 | 73      | 11 | 73      | 10 | 73      | 5  | 73      | 5  |
| 152     | 11 | 709     | 7  | 152     | 22 | 152     | 18 | 152     | 19 | 150     | 12 | 152     | 10 |
| 195     | 10 | 930     | 7  | 195     | 22 | 195     | 15 | 195     | 19 | 1811    | 8  | 325     | 5  |
| 372     | 4  | 3290    | 7  | 227     | 23 | 961     | 19 | 961     | 17 | 2294    | 8  | 497     | 6  |
| 3197    | 8  | 7891    | 7  | 337     | 14 | 2706    | 17 | 2706    | 17 | 3010    | 8  | 1189    | 7  |
| 3290    | 8  | 10321   | 7  | 447     | 17 | 3145    | 17 | 3145    | 16 | 3290    | 8  | 1811    | 7  |
| 9263    | 7  | 10463   | 8  | 489     | 15 | 7028    | 18 | 7028    | 17 | 3388    | 9  | 3290    | 8  |
| 9477    | 7  | 11719   | 7  | 1780    | 21 | 8448    | 16 | 8448    | 19 | 4703    | 9  | 3480    | 8  |
| 11467   | 9  | 13692   | 6  | 6647    | 19 | 8594    | 16 | 8594    | 17 | 6518    | 11 | 6260    | 9  |
| 11719   | 9  | 14233   | 8  | 7337    | 19 | 9452    | 14 | 9452    | 12 | 7521    | 9  | 9055    | 10 |
| 12308   | 9  | 14766   | 7  | 8212    | 18 | 10754   | 18 | 10754   | 14 | 9380    | 9  | 9698    | 10 |
| 12372   | 10 | 14905   | 7  | 8502    | 20 | 11293   | 16 | 11293   | 13 | 9698    | 9  | 10029   | 10 |
| 13617   | 8  | 15452   | 7  | 8567    | 18 | 11719   | 16 | 11719   | 13 | 10506   | 10 | 10398   | 10 |
| 13827   | 7  | 15607   | 7  | 8594    | 20 | 13635   | 17 | 13635   | 15 | 11467   | 9  | 10550   | 10 |
| 13928   | 8  | 15928   | 7  | 8701    | 20 | 13759   | 15 | 13759   | 16 | 11719   | 10 | 11299   | 9  |
| 14766   | 9  | 16126   | 9  | 9452    | 13 | 13971   | 15 | 13971   | 14 | 12308   | 11 | 11467   | 10 |
| 14793   | 8  | 16291   | 10 | 9540    | 19 | 14040   | 16 | 14040   | 14 | 12372   | 12 | 11485   | 10 |
| 16114   | 10 | 16294   | 10 | 9899    | 16 | 14544   | 18 | 14544   | 15 | 13934   | 9  | 11719   | 10 |
| 16256   | 11 | 16296   | 10 | 10398   | 19 | 14587   | 18 | 14587   | 15 | 14139   | 9  | 11840   | 9  |
| 16270   | 11 | 16304   | 9  | 10400   | 20 | 14766   | 16 | 14766   | 17 | 14766   | 9  | 12308   | 10 |
| 16294   | 11 | 16357   | 8  | 10754   | 20 | 14990   | 16 | 14990   | 16 | 15454   | 7  | 12372   | 10 |
| 16350   | 11 | 16497   | 6  | 10873   | 18 | 15385   | 15 | 15385   | 14 | 16343   | 11 | 13740   | 8  |
| 16357   | 10 | 16519   | 4  | 11083   | 18 | 16092   | 18 | 16092   | 18 | 16357   | 10 | 14167   | 10 |
| 16497   | 6  |         |    | 11293   | 16 | 16140   | 17 | 16140   | 18 | 16390   | 11 | 14766   | 9  |
| 16526   | 4  |         |    | 11518   | 19 | 16266   | 19 | 16266   | 17 | 16497   | 6  | 14798   | 9  |
|         |    |         |    | 12705   | 17 | 16293   | 19 | 16293   | 18 | 16519   | 4  | 16224   | 11 |
|         |    |         |    | 13254   | 20 | 16304   | 21 | 16304   | 18 |         |    | 16311   | 10 |
|         |    |         |    | 13281   | 20 | 16311   | 19 | 16311   | 18 |         |    | 16357   | 8  |
|         |    |         |    | 13635   | 18 | 16325   | 18 | 16325   | 17 |         |    | 16497   | 7  |
|         |    |         |    | 13708   | 17 | 16356   | 17 | 16356   | 17 |         |    | 16519   | 5  |
|         |    |         |    | 13971   | 18 |         |    |         |    |         |    |         |    |
|         |    |         |    | 14040   | 17 |         |    |         |    |         |    |         |    |
|         |    |         |    | 14544   | 18 |         |    |         |    |         |    |         |    |
|         |    |         |    | 14783   | 19 |         |    |         |    |         |    |         |    |
|         |    |         |    | 14861   | 18 |         |    |         |    |         |    |         |    |
|         |    |         |    | 14990   | 16 |         |    |         |    |         |    |         |    |
|         |    |         |    | 15043   | 17 |         |    |         |    |         |    |         |    |
|         |    |         |    | 15253   | 17 |         |    |         |    |         |    |         |    |
|         |    |         |    | 15301   | 16 |         |    |         |    |         |    |         |    |
|         |    |         |    | 15385   | 15 |         |    |         |    |         |    |         |    |
|         |    |         |    | 15670   | 20 |         |    |         |    |         |    |         |    |
|         |    |         |    | 16129   | 17 |         |    |         |    |         |    |         |    |
|         |    |         |    | 16223   | 21 |         |    |         |    |         |    |         |    |
|         |    |         |    | 16266   | 19 |         |    |         |    |         |    |         |    |
|         |    |         |    | 16274   | 21 |         |    |         |    |         |    |         |    |
|         |    |         |    | 16294   | 22 |         |    |         |    |         |    |         |    |
|         |    |         |    | 16304   | 20 |         |    |         |    |         |    |         |    |
|         |    |         |    | 16319   | 22 |         |    |         |    |         |    |         |    |
|         |    |         |    | 16320   | 21 |         |    |         |    |         |    |         |    |
|         |    |         |    | 16325   | 20 |         |    |         |    |         |    |         |    |
|         |    |         |    | 16356   | 20 |         |    |         |    |         |    |         |    |
|         |    |         |    | 16362   | 21 |         |    |         |    |         |    |         |    |
|         |    |         |    | 16518   | 12 |         |    |         |    |         |    |         |    |

**Supplementary Table 5.** Sequencing depth of 7 families where father and offspring carrying the mixed haplotypes.

| Group   | relatedness | mean mtDNA depth (x) | mean WGS depth (x) |
|---------|-------------|----------------------|--------------------|
| Family1 | father      | 711                  | 39                 |
| Family1 | proband     | 1106                 | 48                 |
| Family1 | mother      | 717                  | 38                 |
| Family2 | father      | 1702                 | 35                 |
| Family2 | proband     | 2474                 | 39                 |
| Family2 | sibling     | 4086                 | 52                 |
| Family2 | mother      | 1357                 | 37                 |
| Family3 | father      | 1368                 | 43                 |
| Family3 | proband     | 2235                 | 44                 |
| Family3 | mother      | 1966                 | 39                 |
| Family4 | father      | 991                  | 38                 |
| Family4 | proband     | 1308                 | 36                 |
| Family4 | sibling     | 1022                 | 42                 |
| Family4 | mother      | 1312                 | 38                 |
| Family5 | father      | 1627                 | 35                 |
| Family5 | proband     | 2397                 | 35                 |
| Family5 | mother      | 1092                 | 35                 |
| Family6 | father      | 1046                 | 42                 |
| Family6 | proband     | 1315                 | 43                 |
| Family6 | sibling     | 1041                 | 42                 |
| Family6 | mother      | 1091                 | 43                 |
| Family7 | father      | 2389                 | 40                 |
| Family7 | proband     | 2609                 | 40                 |
| Family7 | mother      | 2436                 | 42                 |
